# Supplementary material for: Detection and Identification of Allergens from Canadian Mustard Varieties of Sinapis alba and Brassica juncea
Source: PubMed Central journal article supplement (PMC6770452; doi:10.3390/biom9090489), 2019-09-14
Supplement: biomolecules-09-00489-s001.pdf [file biomolecules-09-00489-s001.pdf]

Appendix 1

AllergenOnline Database v19 (February 10, 2019)

FASTA 36. 80mer Sliding Window Search Results

| <b>P15322: Allergen Sin a 1 [Sinapis alba (White mustard)]</b> |                                                                                                                                                                        |
|----------------------------------------------------------------|------------------------------------------------------------------------------------------------------------------------------------------------------------------------|
| Database                                                       | AllergenOnline Database v19 (February 10, 2019)                                                                                                                        |
| Input Query                                                    | >query<br>PAGPFRI PKCRKEFQQAQHLRACQQWLHKQAMQSGSGPSWTLDDDEFDFEDDMENPQGGPQQ<br>RPPLLQCCNELHQEEPLCVCPTLKGASKAVKQQVRQQLGQQGQQGPHLQHVISRIYQTA<br>THLPKVCNIRQVSVCPFKKTMPPGPS |
| Length                                                         | 145                                                                                                                                                                    |
| Number of 80 mers                                              | 66                                                                                                                                                                     |
| Number of Sequences with hits                                  | 14                                                                                                                                                                     |

| Hit # | Defline                                                   | Species        | Best %ID | # Hits > 35% | Full Alignment |         |        | Links                       |                     |
|-------|-----------------------------------------------------------|----------------|----------|--------------|----------------|---------|--------|-----------------------------|---------------------|
|       |                                                           |                |          |              | E-val          | %ID     | length | NCBI                        | Details             |
| 1     | gi 51338758 gid 192 Allergen Allergen Sin a 1 precursor ( | Sinapis alba   | 100.00%  | 66of66       | 2.4e-034       | 100.00% | 145    | <a href="#">gi 51338758</a> | <a href="#">GO!</a> |
| 2     | gi 1009434 gid 192 Allergen allergen sin a 1.0104 [Sinapi | Sinapis alba   | 100.00%  | 66of66       | 2.3e-033       | 97.20%  | 145    | <a href="#">gi 1009434</a>  | <a href="#">GO!</a> |
| 3     | gi 1009440 gid 192 Allergen allergen sin a 1.0107 [Sinapi | Sinapis alba   | 100.00%  | 66of66       | 1.3e-033       | 98.60%  | 145    | <a href="#">gi 1009440</a>  | <a href="#">GO!</a> |
| 4     | gi 1009438 gid 192 Allergen allergen sin a 1.0106 [Sinapi | Sinapis alba   | 100.00%  | 66of66       | 3.5e-033       | 97.20%  | 145    | <a href="#">gi 1009438</a>  | <a href="#">GO!</a> |
| 5     | gi 1009442 gid 192 Allergen allergen sin a 1.0108 [Sinapi | Sinapis alba   | 98.80%   | 66of66       | 4.9e-033       | 96.60%  | 145    | <a href="#">gi 1009442</a>  | <a href="#">GO!</a> |
| 6     | gi 1009436 gid 192 Allergen allergen sin a 1.0105 [Sinapi | Sinapis alba   | 98.80%   | 66of66       | 4.5e-033       | 97.20%  | 145    | <a href="#">gi 1009436</a>  | <a href="#">GO!</a> |
| 7     | gi 17697 gid 1172 Putative 2S storage protein [Brassica r | Brassica rapa  | 93.80%   | 66of66       | 2.5e-029       | 88.30%  | 145    | <a href="#">gi 17697</a>    | <a href="#">GO!</a> |
| 8     | gi 75107016 gid 1142 Putative Napin-3 (Napin BnIII) (Napi | Brassica napus | 91.20%   | 66of66       | 2.6e-017       | 82.60%  | 144    | <a href="#">gi 75107016</a> | <a href="#">GO!</a> |

|    |                                                            |                   |        |        |          |        |     |                              |                     |
|----|------------------------------------------------------------|-------------------|--------|--------|----------|--------|-----|------------------------------|---------------------|
| 9  | gi 32363444 gid 1170 Putative Allergen Bra j 1-E (Bra j I  | Brassica juncea   | 87.50% | 66of66 | 1.8e-017 | 79.90% | 144 | <a href="#">gi 32363444</a>  | <a href="#">GO!</a> |
| 10 | gi 26985163 gid 386 Putative recombinant Ib pronapin prec  | Brassica napus    | 53.80% | 66of66 | 0.00026  | 50.40% | 129 | <a href="#">gi 26985163</a>  | <a href="#">GO!</a> |
| 11 | gi 110349081 gid 1270 Putative Pis v 1 allergen 2S albumi  | Pistacia vera     | 39.99% | 19of66 | 0.31     | 32.60% | 129 | <a href="#">gi 110349081</a> | <a href="#">GO!</a> |
| 12 | gi 13183175 gid 204 Putative 2S albumin [Sesamum indicum]  | Sesamum indicum   | 35.80% | 2of66  | 0.37     | 32.30% | 130 | <a href="#">gi 13183175</a>  | <a href="#">GO!</a> |
| 13 | gi 209165427 gid 204 Putative 2S albumin [Sesamum indicum] | Sesamum indicum   | 35.80% | 2of66  | 0.56     | 32.30% | 130 | <a href="#">gi 209165427</a> | <a href="#">GO!</a> |
| 14 | gi 62550933 gid 154 Putative putative LMW-glutenin subuni  | Triticum aestivum | 35.40% | 2of66  | 6.9      | 27.90% | 140 | <a href="#">gi 62550933</a>  | <a href="#">GO!</a> |

**P80207: Allergen Bra j 1-E [Brassica juncea (Indian mustard)]**

|                                      |                                                                                                                                                       |
|--------------------------------------|-------------------------------------------------------------------------------------------------------------------------------------------------------|
| <b>Database</b>                      | AllergenOnline Database v19 (February 10, 2019)                                                                                                       |
| <b>Input Query</b>                   | >query<br>AGPFRFRFPRCRKEFQQAQHLRACQQWLHKQAMQSGSGPQPQGPQQRPPLLQCCNELHQEE<br>PLCVCPTLKGASKAVKQQIRQQGQQQGQQGQQQLQHEISRYYQTATHLPRVCNIPRVSICP<br>FQKTMPGPS |
| <b>Length</b>                        | 129                                                                                                                                                   |
| <b>Number of 80 mers</b>             | 50                                                                                                                                                    |
| <b>Number of Sequences with hits</b> | 35                                                                                                                                                    |

| Hit # | Defline                                                   | Species         | Best %ID | # Hits > 35% | Full Alignment |         |        | Links                       |                     |
|-------|-----------------------------------------------------------|-----------------|----------|--------------|----------------|---------|--------|-----------------------------|---------------------|
|       |                                                           |                 |          |              | E-val          | %ID     | length | NCBI                        | Details             |
| 1     | gi 32363444 gid 1170 Putative Allergen Bra j 1-E (Bra j l | Brassica juncea | 100.00%  | 50of50       | 7.1e-023       | 100.00% | 129    | <a href="#">gi 32363444</a> | <a href="#">GO!</a> |
| 2     | gi 75107016 gid 1142 Putative Napin-3 (Napin BnIII) (Napi | Brassica napus  | 92.50%   | 50of50       | 8.9e-020       | 89.10%  | 129    | <a href="#">gi 75107016</a> | <a href="#">GO!</a> |
| 3     | gi 1009434 gid 192 Allergen allergen sin a 1.0104 [Sinapi | Sinapis alba    | 88.78%   | 50of50       | 2.5e-013       | 80.60%  | 144    | <a href="#">gi 1009434</a>  | <a href="#">GO!</a> |
| 4     | gi 1009440 gid 192 Allergen allergen sin a 1.0107 [Sinapi | Sinapis alba    | 88.78%   | 50of50       | 2e-013         | 80.60%  | 144    | <a href="#">gi 1009440</a>  | <a href="#">GO!</a> |

|    |                                                           |                   |        |        |          |        |     |                              |                     |
|----|-----------------------------------------------------------|-------------------|--------|--------|----------|--------|-----|------------------------------|---------------------|
| 5  | gi 1009438 gid 192 Allergen allergen sin a 1.0106 [Sinapi | Sinapis alba      | 88.78% | 50of50 | 2.2e-013 | 79.90% | 144 | <a href="#">gi 1009438</a>   | <a href="#">GO!</a> |
| 6  | gi 1009436 gid 192 Allergen allergen sin a 1.0105 [Sinapi | Sinapis alba      | 88.78% | 50of50 | 2e-013   | 80.60% | 144 | <a href="#">gi 1009436</a>   | <a href="#">GO!</a> |
| 7  | gi 1009442 gid 192 Allergen allergen sin a 1.0108 [Sinapi | Sinapis alba      | 87.50% | 50of50 | 2.9e-013 | 79.20% | 144 | <a href="#">gi 1009442</a>   | <a href="#">GO!</a> |
| 8  | gi 51338758 gid 192 Allergen Allergen Sin a 1 precursor ( | Sinapis alba      | 87.50% | 50of50 | 5.7e-013 | 79.90% | 144 | <a href="#">gi 51338758</a>  | <a href="#">GO!</a> |
| 9  | gi 17697 gid 1172 Putative 2S storage protein [Brassica r | Brassica rapa     | 85.00% | 50of50 | 1e-011   | 77.10% | 144 | <a href="#">gi 17697</a>     | <a href="#">GO!</a> |
| 10 | gi 26985163 gid 386 Putative recombinant Ib pronapin prec | Brassica napus    | 55.00% | 50of50 | 3.8e-006 | 50.00% | 114 | <a href="#">gi 26985163</a>  | <a href="#">GO!</a> |
| 11 | gi 21068 gid 104 Allergen 2S albumin precursor [Ricinus c | Ricinus communis  | 40.00% | 11of50 | 0.16     | 34.50% | 113 | <a href="#">gi 21068</a>     | <a href="#">GO!</a> |
| 12 | gi 110349081 gid 1270 Putative Pis v 1 allergen 2S albumi | Pistacia vera     | 38.71% | 17of50 | 0.76     | 33.90% | 115 | <a href="#">gi 110349081</a> | <a href="#">GO!</a> |
| 13 | gi 170708 gid 152 Allergen gamma-gliadin B precursor      | Triticum aestivum | 37.80% | 11of50 | 10       | 25.90% | 135 | <a href="#">gi 170708</a>    | <a href="#">GO!</a> |
| 14 | gi 209165427 gid 204 Putative 2S albumin [Sesamum indicum | Sesamum indicum   | 37.50% | 6of50  | 0.12     | 33.60% | 122 | <a href="#">gi 209165427</a> | <a href="#">GO!</a> |
| 15 | gi 13183175 gid 204 Putative 2S albumin [Sesamum indicum] | Sesamum indicum   | 37.50% | 6of50  | 0.091    | 33.60% | 122 | <a href="#">gi 13183175</a>  | <a href="#">GO!</a> |
| 16 | gi 736319 gid 160 Allergen glutenin [Triticum aestivum]   | Triticum aestivum | 37.30% | 2of50  | 12       | 32.70% | 107 | <a href="#">gi 736319</a>    | <a href="#">GO!</a> |
| 17 | gi 288860106 gid 160 Allergen high molecular weight glute | Triticum aestivum | 37.00% | 5of50  | 20       | 36.80% | 87  | <a href="#">gi 288860106</a> | <a href="#">GO!</a> |
| 18 | gi 75219081 gid 154 Putative LMM glutenin 1               | Triticum aestivum | 36.90% | 7of50  | 8.4      | 32.30% | 99  | <a href="#">gi 75219081</a>  | <a href="#">GO!</a> |
| 19 | gi 170736 gid 152 Allergen gamma-gliadin                  | Triticum aestivum | 36.80% | 10of50 | 6.9      | 33.00% | 103 | <a href="#">gi 170736</a>    | <a href="#">GO!</a> |
| 20 | gi 508732621 gid 152 Allergen gamma-gliadin, partial [Tri | Triticum aestivum | 36.80% | 10of50 | 7.3      | 33.00% | 103 | <a href="#">gi 508732621</a> | <a href="#">GO!</a> |

|    |                                                           |                   |        |       |       |        |     |                              |                     |
|----|-----------------------------------------------------------|-------------------|--------|-------|-------|--------|-----|------------------------------|---------------------|
| 21 | gi 886967 gid 154 Putative low molecular weight glutenin  | Triticum aestivum | 36.70% | 7of50 | 21    | 36.00% | 100 | <a href="#">gi 886967</a>    | <a href="#">GO!</a> |
| 22 | gi 508732623 gid 150 Allergen omega-gliadin, partial [Tri | Triticum aestivum | 36.60% | 3of50 | 7.6   | 35.50% | 93  | <a href="#">gi 508732623</a> | <a href="#">GO!</a> |
| 23 | gi 73912496 gid 150 Allergen omega-5 gliadin [Triticum ae | Triticum aestivum | 36.50% | 9of50 | 7.5   | 25.40% | 122 | <a href="#">gi 73912496</a>  | <a href="#">GO!</a> |
| 24 | gi 21743 gid 160 Allergen high molecular weight glutenin  | Triticum aestivum | 36.40% | 3of50 | 7.6   | 36.40% | 88  | <a href="#">gi 21743</a>     | <a href="#">GO!</a> |
| 25 | gi 508732625 gid 160 Allergen high molecular weight glute | Triticum aestivum | 36.40% | 2of50 | 7.4   | 36.40% | 88  | <a href="#">gi 508732625</a> | <a href="#">GO!</a> |
| 26 | gi 886965 gid 154 Putative low molecular weight glutenin  | Triticum aestivum | 36.40% | 3of50 | 15    | 36.50% | 96  | <a href="#">gi 886965</a>    | <a href="#">GO!</a> |
| 27 | gi 170743 gid 160 Allergen HMW glutenin subunit Ax2* [Tri | Triticum aestivum | 36.40% | 2of50 | 7.5   | 36.40% | 88  | <a href="#">gi 170743</a>    | <a href="#">GO!</a> |
| 28 | gi 886963 gid 154 Putative low molecular weight glutenin  | Triticum aestivum | 36.26% | 8of50 | 8.3   | 31.00% | 116 | <a href="#">gi 886963</a>    | <a href="#">GO!</a> |
| 29 | gi 170738 gid 152 Allergen gamma-gliadin                  | Triticum aestivum | 36.24% | 6of50 | 3.6   | 27.60% | 127 | <a href="#">gi 170738</a>    | <a href="#">GO!</a> |
| 30 | gi 226437844 gid 1383 Allergen 2S albumin [Corylus avella | Corylus avellana  | 36.24% | 2of50 | 0.054 | 33.00% | 109 | <a href="#">gi 226437844</a> | <a href="#">GO!</a> |
| 31 | gi 283476402 gid 1617 Putative alpha/beta gliadin precurs | Triticum aestivum | 35.90% | 4of50 | 11    | 29.90% | 117 | <a href="#">gi 283476402</a> | <a href="#">GO!</a> |
| 32 | gi 208605348 gid 150 Allergen D-type LMW glutenin subunit | Triticum aestivum | 35.60% | 1of50 | 9.5   | 28.70% | 129 | <a href="#">gi 208605348</a> | <a href="#">GO!</a> |
| 33 | gi 208605346 gid 150 Allergen D-type LMW glutenin subunit | Triticum aestivum | 35.60% | 1of50 | 1     | 28.50% | 130 | <a href="#">gi 208605346</a> | <a href="#">GO!</a> |
| 34 | gi 75317968 gid 154 Putative LMM glutenin 3               | Triticum aestivum | 35.03% | 1of50 | 6     | 31.90% | 94  | <a href="#">gi 75317968</a>  | <a href="#">GO!</a> |
| 35 | gi 208605344 gid 150 Allergen D-type LMW glutenin subunit | Triticum aestivum | 35.00% | 2of50 | 5.2   | 31.20% | 125 | <a href="#">gi 208605344</a> | <a href="#">GO!</a> |

| Q2TLWO: 11S globulin [Sinapis alba (White mustard)] |                                                                                                                                                                                                                                                                                                                                                                                                                                                                                                                                                                           |
|-----------------------------------------------------|---------------------------------------------------------------------------------------------------------------------------------------------------------------------------------------------------------------------------------------------------------------------------------------------------------------------------------------------------------------------------------------------------------------------------------------------------------------------------------------------------------------------------------------------------------------------------|
| Database                                            | AllergenOnline Database v19 (February 10, 2019)                                                                                                                                                                                                                                                                                                                                                                                                                                                                                                                           |
| Input Query                                         | >query<br>MVKLAHLLVATVGVLLVNLGCLARQSLGVPPQVKDACNLNDLVLQPTVEIKSEAGQVEY<br>WDHNHPQIRCAGVSIARLVIQKGGLYLPTFFSSPFISYVVQGMGISGRVIPGCAETFMDS<br>QPMQQGGQQGGQQGGQQGGQQGGQQGGQQGGQQGGQQGGQQGGQQGGQQGGQGRDMHQK<br>VEHVRHGDIAIAMPGSAQWIYNTGDQPLIIIVSLIDIANYQNQLDRNPRTFRLAGNNQQGS<br>SQQQQQQQNIILSGFDPQVLAQALKIDVRLAQELQNQQDKRGNIVRVKGPVFQVVRPPLRQ<br>AYESEQWRHPRGPPQSPQDNGLEETICSMRTHENIDDPARADIYKPNLGRVTSVNSYTLP<br>ILQYIRLSATRGIHQGSAMVLPKYNMNANEIILYCTQGQARIQVVDNDGQNVLDQQVQKGG<br>LVVIPQGFAYVVQSQNNFEWISFKTNANAMISTLAGRTSALRALPLEVITNAYQISLEEA<br>RKIKFNTLETTLTRARGGQQPQLIEEIVEV |
| Length                                              | 510                                                                                                                                                                                                                                                                                                                                                                                                                                                                                                                                                                       |
| Number of 80 mers                                   | 431                                                                                                                                                                                                                                                                                                                                                                                                                                                                                                                                                                       |
| Number of Sequences with hits                       | 90                                                                                                                                                                                                                                                                                                                                                                                                                                                                                                                                                                        |

| Hit # | Define                                                    | Species           | Best %ID | # Hits > 35% | Full Alignment |         |        | Links                         |                     |
|-------|-----------------------------------------------------------|-------------------|----------|--------------|----------------|---------|--------|-------------------------------|---------------------|
|       |                                                           |                   |          |              | E-val          | %ID     | length | NCBI                          | Details             |
| 1     | gi 62240392 gid 837 Allergen 11S globulin precursor [Sina | Sinapis alba      | 100.00%  | 431of431     | 6.6e-160       | 92.20%  | 523    | <a href="#">gi 62240392</a>   | <a href="#">GO!</a> |
| 2     | gi 62240390 gid 837 Allergen 11S globulin precursor [Sina | Sinapis alba      | 100.00%  | 431of431     | 0              | 100.00% | 510    | <a href="#">gi 62240390</a>   | <a href="#">GO!</a> |
| 3     | gi 158998782 gid 2066 Putative 11S legumin protein [Carya | Carya illinoensis | 62.51%   | 351of431     | 2.6e-061       | 43.20%  | 521    | <a href="#">gi 158998782</a>  | <a href="#">GO!</a> |
| 4     | gi 1126299828 gid 2597 Putative legumin [Juglans nigra]   | Juglans nigra     | 62.51%   | 362of431     | 2.7e-058       | 42.00%  | 528    | <a href="#">gi 1126299828</a> | <a href="#">GO!</a> |
| 5     | gi 158998780 gid 2066 Putative 11S legumin protein [Carya | Carya illinoensis | 61.30%   | 348of431     | 3.5e-061       | 42.80%  | 521    | <a href="#">gi 158998780</a>  | <a href="#">GO!</a> |
| 6     | gi 56788031 gid 817 Putative seed storage protein [Juglan | Juglans regia     | 61.30%   | 363of431     | 1.2e-061       | 42.30%  | 534    | <a href="#">gi 56788031</a>   | <a href="#">GO!</a> |

|    |                                                           |                        |        |          |          |        |     |                              |                     |
|----|-----------------------------------------------------------|------------------------|--------|----------|----------|--------|-----|------------------------------|---------------------|
| 7  | gi 258588247 gid 1572 Putative Chain A, Crystal Structure | Prunus dulcis          | 60.50% | 424of431 | 2.1e-051 | 46.70% | 522 | <a href="#">gi 258588247</a> | <a href="#">GO!</a> |
| 8  | gi 307159112 gid 1572 Putative prunin 1 precursor [Prunus | Prunus dulcis          | 60.50% | 431of431 | 8.3e-052 | 46.40% | 541 | <a href="#">gi 307159112</a> | <a href="#">GO!</a> |
| 9  | gi 25991543 gid 76 Allergen allergen Ana 0 2 [Anacardium  | Anacardium occidentale | 60.04% | 380of431 | 2.3e-070 | 44.80% | 498 | <a href="#">gi 25991543</a>  | <a href="#">GO!</a> |
| 10 | gi 288860106 gid 160 Allergen high molecular weight glute | Triticum aestivum      | 60.00% | 84of431  | 3.5e-018 | 37.60% | 213 | <a href="#">gi 288860106</a> | <a href="#">GO!</a> |
| 11 | gi 736319 gid 160 Allergen glutenin [Triticum aestivum]   | Triticum aestivum      | 58.50% | 79of431  | 1.9e-013 | 35.30% | 215 | <a href="#">gi 736319</a>    | <a href="#">GO!</a> |
| 12 | gi 18479082 gid 392 Allergen 11S globulin-like protein [C | Corylus avellana       | 58.00% | 387of431 | 3.6e-061 | 45.70% | 534 | <a href="#">gi 18479082</a>  | <a href="#">GO!</a> |
| 13 | gi 557792009 gid 392 Allergen Cor a 9 allergen [Corylus a | Corylus avellana       | 58.00% | 380of431 | 1.6e-061 | 44.90% | 534 | <a href="#">gi 557792009</a> | <a href="#">GO!</a> |
| 14 | gi 307159114 gid 1572 Putative prunin 2 precursor, partia | Prunus dulcis          | 57.80% | 418of431 | 3e-061   | 45.60% | 522 | <a href="#">gi 307159114</a> | <a href="#">GO!</a> |
| 15 | gi 82469930 gid 2650 Allergen 11S globulin-like protein [ | Actinidia chinensis    | 57.50% | 352of431 | 2.3e-068 | 41.40% | 503 | <a href="#">gi 82469930</a>  | <a href="#">GO!</a> |
| 16 | gi 523916668 gid 1572 Putative putative Pru du 6 allergen | Prunus dulcis          | 56.26% | 165of431 | 8.7e-020 | 47.20% | 195 | <a href="#">gi 523916668</a> | <a href="#">GO!</a> |
| 17 | gi 13183173 gid 2274 Putative 11S globulin [Sesamum indic | Sesamum indicum        | 55.00% | 342of431 | 3.7e-060 | 42.10% | 470 | <a href="#">gi 13183173</a>  | <a href="#">GO!</a> |
| 18 | gi 156001070 gid 1093 Putative 11S globulin [Pistacia ver | Pistacia vera          | 55.00% | 356of431 | 6.5e-053 | 41.80% | 505 | <a href="#">gi 156001070</a> | <a href="#">GO!</a> |
| 19 | gi 110349083 gid 1093 Putative Pis v 2.0101 allergen11S g | Pistacia vera          | 55.00% | 346of431 | 9.9e-050 | 41.40% | 510 | <a href="#">gi 110349083</a> | <a href="#">GO!</a> |
| 20 | gi 110349085 gid 1093 Putative Pis v 2.0201 allergen 11S  | Pistacia vera          | 55.00% | 356of431 | 1.2e-052 | 41.60% | 505 | <a href="#">gi 110349085</a> | <a href="#">GO!</a> |
| 21 | gi 113200131 gid 531 Putative allergenic protein [Fagopyr | Fagopyrum tataricum    | 55.00% | 256of431 | 1.5e-043 | 38.10% | 486 | <a href="#">gi 113200131</a> | <a href="#">GO!</a> |
| 22 | gi 18639 gid 733 Putative glycinin subunit G3 [Glycine ma | Glycine max            | 53.10% | 272of431 | 2e-038   | 36.20% | 514 | <a href="#">gi 18639</a>     | <a href="#">GO!</a> |
| 23 | gi 169973 gid 572 Putative glycinin A-1a-B-x subunit [Gly | Glycine max            | 52.50% | 259of431 | 6.7e-044 | 37.30% | 518 | <a href="#">gi 169973</a>    | <a href="#">GO!</a> |

|    |                                                           |                      |        |          |          |        |     |                              |                     |
|----|-----------------------------------------------------------|----------------------|--------|----------|----------|--------|-----|------------------------------|---------------------|
| 24 | gi 18615 gid 572 Putative Glycinin-like [Glycine max]     | Glycine max          | 52.50% | 259of431 | 3.6e-044 | 37.30% | 518 | <a href="#">gi 18615</a>     | <a href="#">GO!</a> |
| 25 | gi 30313867 gid 347 Putative 11S globulin [Bertholletia e | Bertholletia excelsa | 52.50% | 318of431 | 5.8e-059 | 39.20% | 510 | <a href="#">gi 30313867</a>  | <a href="#">GO!</a> |
| 26 | gi 29839255 gid 531 Putative 13S globulin seed storage pr | Fagopyrum esculentum | 51.20% | 229of431 | 1.3e-040 | 36.10% | 477 | <a href="#">gi 29839255</a>  | <a href="#">GO!</a> |
| 27 | gi 21779 gid 160 Allergen HMW glutenin-like protein produ | Triticum aestivum    | 50.60% | 76of431  | 2.8e-008 | 27.80% | 410 | <a href="#">gi 21779</a>     | <a href="#">GO!</a> |
| 28 | gi 18609 gid 732 Putative Glycinin A2B1a subunit-like [Gl | Glycine max          | 50.00% | 234of431 | 1.1e-028 | 35.70% | 504 | <a href="#">gi 18609</a>     | <a href="#">GO!</a> |
| 29 | gi 29839254 gid 531 Putative 13S globulin seed storage pr | Fagopyrum esculentum | 50.00% | 246of431 | 1e-041   | 35.60% | 506 | <a href="#">gi 29839254</a>  | <a href="#">GO!</a> |
| 30 | gi 218265 gid 732 Putative glycinin A2B1a subunit [Glycin | Glycine max          | 50.00% | 234of431 | 1.1e-028 | 35.70% | 504 | <a href="#">gi 218265</a>    | <a href="#">GO!</a> |
| 31 | gi 29839419 gid 531 Putative 13S globulin seed storage pr | Fagopyrum esculentum | 50.00% | 248of431 | 1.2e-034 | 37.00% | 487 | <a href="#">gi 29839419</a>  | <a href="#">GO!</a> |
| 32 | gi 71084277 gid 160 Allergen HMW glutenin x-type subunit  | Triticum aestivum    | 50.00% | 83of431  | 7.2e-011 | 35.20% | 250 | <a href="#">gi 71084277</a>  | <a href="#">GO!</a> |
| 33 | gi 3703107 gid 291 Allergen glycinin [Arachis hypogaea]   | Arachis hypogaea     | 49.40% | 173of431 | 2.7e-025 | 32.70% | 513 | <a href="#">gi 3703107</a>   | <a href="#">GO!</a> |
| 34 | gi 5381325 gid 2273 Allergen 11S globulin precursor [Sesa | Sesamum indicum      | 49.40% | 225of431 | 9.2e-052 | 34.60% | 503 | <a href="#">gi 5381325</a>   | <a href="#">GO!</a> |
| 35 | gi 22135348 gid 291 Allergen trypsin inhibitor [Arachis h | Arachis hypogaea     | 49.40% | 80of431  | 1.8e-013 | 33.70% | 243 | <a href="#">gi 22135348</a>  | <a href="#">GO!</a> |
| 36 | gi 21314465 gid 291 Allergen allergen Arah3/Arah4 [Arachi | Arachis hypogaea     | 49.40% | 246of431 | 3e-013   | 33.80% | 550 | <a href="#">gi 21314465</a>  | <a href="#">GO!</a> |
| 37 | gi 10566449 gid 574 Putative glycinin A3B4 subunit [Glyci | Glycine max          | 48.78% | 229of431 | 2.1e-027 | 32.70% | 547 | <a href="#">gi 10566449</a>  | <a href="#">GO!</a> |
| 38 | gi 21743 gid 160 Allergen high molecular weight glutenin  | Triticum aestivum    | 48.75% | 69of431  | 3.2e-012 | 35.40% | 229 | <a href="#">gi 21743</a>     | <a href="#">GO!</a> |
| 39 | gi 5712199 gid 291 Allergen glycinin [Arachis hypogaea]   | Arachis hypogaea     | 48.70% | 162of431 | 2.8e-023 | 32.30% | 539 | <a href="#">gi 5712199</a>   | <a href="#">GO!</a> |
| 40 | gi 224036293 gid 291 Allergen Chain A, Crystal Structure  | Arachis hypogaea     | 48.70% | 190of431 | 1.4e-026 | 33.10% | 513 | <a href="#">gi 224036293</a> | <a href="#">GO!</a> |



|    |                                                           |                                |        |          |          |        |     |                              |                     |
|----|-----------------------------------------------------------|--------------------------------|--------|----------|----------|--------|-----|------------------------------|---------------------|
| 41 | gi 199732457 gid 291 Allergen arachin Arah3 isoform [Arac | Arachis hypogaea               | 48.70% | 190of431 | 1.4e-026 | 32.80% | 539 | <a href="#">gi 199732457</a> | <a href="#">GO!</a> |
| 42 | gi 806556 gid 573 Putative A5A4B3 subunit [Glycine soja]  | Glycine soja                   | 48.10% | 243of431 | 4.7e-028 | 31.00% | 581 | <a href="#">gi 806556</a>    | <a href="#">GO!</a> |
| 43 | gi 18641 gid 573 Putative glycinin [Glycine max]          | Glycine max                    | 48.10% | 227of431 | 3.4e-028 | 30.50% | 581 | <a href="#">gi 18641</a>     | <a href="#">GO!</a> |
| 44 | gi 4249568 gid 573 Putative glycinin [Glycine max]        | Glycine max                    | 48.10% | 243of431 | 3.4e-028 | 31.00% | 581 | <a href="#">gi 4249568</a>   | <a href="#">GO!</a> |
| 45 | gi 22090 gid 160 Allergen HMW glutenin subunit 1By9 [Trit | Triticum aestivum              | 48.10% | 76of431  | 2.1e-011 | 30.80% | 318 | <a href="#">gi 22090</a>     | <a href="#">GO!</a> |
| 46 | gi 21751 gid 160 Allergen high molecular weight glutenin  | Triticum aestivum              | 47.60% | 74of431  | 1.7e-008 | 30.30% | 297 | <a href="#">gi 21751</a>     | <a href="#">GO!</a> |
| 47 | gi 508732625 gid 160 Allergen high molecular weight glute | Triticum aestivum              | 47.52% | 66of431  | 1.4e-012 | 35.40% | 229 | <a href="#">gi 508732625</a> | <a href="#">GO!</a> |
| 48 | gi 170743 gid 160 Allergen HMW glutenin subunit Ax2* [Tri | Triticum aestivum              | 47.52% | 66of431  | 1.4e-012 | 35.40% | 229 | <a href="#">gi 170743</a>    | <a href="#">GO!</a> |
| 49 | gi 732706 gid 573 Putative Glycinin-like protein product  | Glycine max                    | 46.90% | 221of431 | 8.8e-028 | 30.50% | 580 | <a href="#">gi 732706</a>    | <a href="#">GO!</a> |
| 50 | gi 169971 gid 574 Putative glycinin precursor             | Glycine max                    | 46.30% | 115of431 | 6.2e-027 | 38.70% | 191 | <a href="#">gi 169971</a>    | <a href="#">GO!</a> |
| 51 | gi 584592120 gid 2481 Putative 13S globulin [Fagopyrum es | Fagopyrum esculentum           | 46.30% | 242of431 | 5.4e-027 | 33.90% | 496 | <a href="#">gi 584592120</a> | <a href="#">GO!</a> |
| 52 | gi 169969 gid 574 Putative glycinin                       | Glycine max                    | 46.30% | 215of431 | 1.3e-015 | 32.00% | 547 | <a href="#">gi 169969</a>    | <a href="#">GO!</a> |
| 53 | gi 584592116 gid 2481 Putative 13S globulin [Fagopyrum es | Fagopyrum esculentum           | 46.30% | 247of431 | 5.4e-027 | 34.10% | 496 | <a href="#">gi 584592116</a> | <a href="#">GO!</a> |
| 54 | gi 312233065 gid 291 Allergen Ara h 3 allergen [Arachis h | Arachis hypogaea               | 46.22% | 192of431 | 4.8e-026 | 32.70% | 517 | <a href="#">gi 312233065</a> | <a href="#">GO!</a> |
| 55 | gi 112380623 gid 291 Allergen iso-Ara h3 [Arachis hypogae | Arachis hypogaea               | 46.22% | 195of431 | 1.4e-026 | 32.90% | 517 | <a href="#">gi 112380623</a> | <a href="#">GO!</a> |
| 56 | gi 21930 gid 154 Putative LMW glutenin [Triticum turgidum | Triticum turgidum subsp. durum | 43.74% | 44of431  | 1.9e-006 | 29.00% | 176 | <a href="#">gi 21930</a>     | <a href="#">GO!</a> |
| 57 | gi 170732 gid 154 Putative gamma-gliadin                  | Triticum aestivum              | 43.74% | 42of431  | 5.7e-006 | 47.90% | 73  | <a href="#">gi 170732</a>    | <a href="#">GO!</a> |

|    |                                                           |                                |        |         |          |        |     |                              |                     |
|----|-----------------------------------------------------------|--------------------------------|--------|---------|----------|--------|-----|------------------------------|---------------------|
| 58 | gi 170730 gid 154 Putative pre-gamma-gliadin B-I          | Triticum aestivum              | 43.74% | 42of431 | 5.2e-006 | 47.90% | 73  | <a href="#">gi 170730</a>    | <a href="#">GO!</a> |
| 59 | gi 62550933 gid 154 Putative putative LMW-glutenin subuni | Triticum aestivum              | 43.73% | 48of431 | 0.0011   | 50.70% | 69  | <a href="#">gi 62550933</a>  | <a href="#">GO!</a> |
| 60 | gi 283476402 gid 1617 Putative alpha/beta gliadin precurs | Triticum aestivum              | 42.54% | 40of431 | 9.5e-005 | 43.60% | 78  | <a href="#">gi 283476402</a> | <a href="#">GO!</a> |
| 61 | gi 21926 gid 154 Putative glutenin-like protein product [ | Triticum turgidum subsp. durum | 42.50% | 40of431 | 7.4e-005 | 27.30% | 176 | <a href="#">gi 21926</a>     | <a href="#">GO!</a> |
| 62 | gi 75317968 gid 154 Putative LMM glutenin 3               | Triticum aestivum              | 41.25% | 18of431 | 7.3e-005 | 42.70% | 75  | <a href="#">gi 75317968</a>  | <a href="#">GO!</a> |
| 63 | gi 75219081 gid 154 Putative LMM glutenin 1               | Triticum aestivum              | 41.23% | 36of431 | 1.5e-005 | 27.20% | 173 | <a href="#">gi 75219081</a>  | <a href="#">GO!</a> |
| 64 | gi 208605348 gid 150 Allergen D-type LMW glutenin subunit | Triticum aestivum              | 40.70% | 45of431 | 2e-006   | 29.00% | 245 | <a href="#">gi 208605348</a> | <a href="#">GO!</a> |
| 65 | gi 208605346 gid 150 Allergen D-type LMW glutenin subunit | Triticum aestivum              | 40.70% | 45of431 | 1.5e-006 | 30.00% | 207 | <a href="#">gi 208605346</a> | <a href="#">GO!</a> |
| 66 | gi 897811 gid 160 Allergen HMW gluten-like protein produc | Triticum aestivum              | 39.98% | 47of431 | 2.3e-006 | 48.40% | 64  | <a href="#">gi 897811</a>    | <a href="#">GO!</a> |
| 67 | gi 21757 gid 151 Allergen Gliadin-like protein product [T | Triticum aestivum              | 39.96% | 24of431 | 0.00026  | 31.30% | 163 | <a href="#">gi 21757</a>     | <a href="#">GO!</a> |
| 68 | gi 170722 gid 151 Allergen pre-alpha-/beta-gliadin A-I    | Triticum aestivum              | 39.50% | 22of431 | 0.0001   | 29.80% | 188 | <a href="#">gi 170722</a>    | <a href="#">GO!</a> |
| 69 | gi 170736 gid 152 Allergen gamma-gliadin                  | Triticum aestivum              | 38.80% | 29of431 | 0.0094   | 29.60% | 206 | <a href="#">gi 170736</a>    | <a href="#">GO!</a> |
| 70 | gi 508732621 gid 152 Allergen gamma-gliadin, partial [Tri | Triticum aestivum              | 38.80% | 29of431 | 0.0057   | 29.40% | 218 | <a href="#">gi 508732621</a> | <a href="#">GO!</a> |
| 71 | gi 21673 gid 151 Allergen Alpha/beta gliadin-like protein | Triticum aestivum              | 38.78% | 30of431 | 1.3e-006 | 30.20% | 182 | <a href="#">gi 21673</a>     | <a href="#">GO!</a> |
| 72 | gi 21761 gid 151 Allergen Gliadin-like protein product [T | Triticum aestivum              | 37.80% | 15of431 | 0.00029  | 30.00% | 180 | <a href="#">gi 21761</a>     | <a href="#">GO!</a> |
| 73 | gi 170738 gid 152 Allergen gamma-gliadin                  | Triticum aestivum              | 37.54% | 38of431 | 0.1      | 30.90% | 178 | <a href="#">gi 170738</a>    | <a href="#">GO!</a> |
| 74 | gi 73912496 gid 150 Allergen omega-5 gliadin [Triticum ae | Triticum aestivum              | 37.54% | 31of431 | 2.3e-006 | 30.60% | 219 | <a href="#">gi 73912496</a>  | <a href="#">GO!</a> |
| 75 | gi 170708 gid 152 Allergen gamma-gliadin B precursor      | Triticum aestivum              | 37.54% | 4of431  | 0.27     | 28.60% | 182 | <a href="#">gi 170708</a>    | <a href="#">GO!</a> |

|    |                                                           |                                         |        |         |          |        |     |                               |                     |
|----|-----------------------------------------------------------|-----------------------------------------|--------|---------|----------|--------|-----|-------------------------------|---------------------|
| 76 | gi 1137166044 gid 151 Allergen alpha-gliadin, partial [Tr | Triticum monococcum subsp. aegilopoides | 37.54% | 43of431 | 1.9e-006 | 30.90% | 191 | <a href="#">gi 1137166044</a> | <a href="#">GO!</a> |
| 77 | gi 170740 gid 151 Allergen gliadin                        | Triticum urartu                         | 37.50% | 25of431 | 0.0005   | 30.20% | 192 | <a href="#">gi 170740</a>     | <a href="#">GO!</a> |
| 78 | gi 21765 gid 151 Allergen Gliadin-like protein product [T | Triticum aestivum                       | 36.29% | 28of431 | 2.5e-006 | 28.80% | 208 | <a href="#">gi 21765</a>      | <a href="#">GO!</a> |
| 79 | gi 170718 gid 151 Allergen alpha/beta-gliadin precursor   | Triticum aestivum                       | 36.29% | 28of431 | 1.8e-006 | 28.80% | 208 | <a href="#">gi 170718</a>     | <a href="#">GO!</a> |
| 80 | gi 21783 gid 154 Putative LMW glutenin-like protein produ | Triticum aestivum                       | 36.27% | 28of431 | 9.4e-005 | 50.90% | 57  | <a href="#">gi 21783</a>      | <a href="#">GO!</a> |
| 81 | gi 21755 gid 151 Allergen Alpha/beta gliadin-like protein | Triticum aestivum                       | 36.24% | 15of431 | 0.00016  | 28.70% | 181 | <a href="#">gi 21755</a>      | <a href="#">GO!</a> |
| 82 | gi 170720 gid 151 Allergen alpha/beta-gliadin precursor [ | Triticum aestivum                       | 36.24% | 15of431 | 0.00016  | 28.70% | 181 | <a href="#">gi 170720</a>     | <a href="#">GO!</a> |
| 83 | gi 170702 gid 152 Allergen gamma gliadin precursor        | Triticum aestivum                       | 36.24% | 21of431 | 0.0064   | 29.10% | 151 | <a href="#">gi 170702</a>     | <a href="#">GO!</a> |
| 84 | gi 508732623 gid 150 Allergen omega-gliadin, partial [Tri | Triticum aestivum                       | 36.22% | 32of431 | 0.16     | 27.70% | 202 | <a href="#">gi 508732623</a>  | <a href="#">GO!</a> |
| 85 | gi 170734 gid 154 Putative gamma gliadin B-III            | Triticum aestivum                       | 35.03% | 29of431 | 0.00033  | 51.90% | 54  | <a href="#">gi 170734</a>     | <a href="#">GO!</a> |
| 86 | gi 508732627 gid 154 Putative low molecular weight gluten | Triticum aestivum                       | 35.03% | 29of431 | 0.0004   | 51.90% | 54  | <a href="#">gi 508732627</a>  | <a href="#">GO!</a> |
| 87 | gi 21773 gid 154 Putative LMW glutenin-like protein produ | Triticum aestivum                       | 35.03% | 29of431 | 0.00044  | 51.90% | 54  | <a href="#">gi 21773</a>      | <a href="#">GO!</a> |
| 88 | gi 335331566 gid 154 Putative low molecular weight gluten | Triticum aestivum                       | 35.03% | 1of431  | 0.0027   | 23.80% | 323 | <a href="#">gi 335331566</a>  | <a href="#">GO!</a> |
| 89 | gi 170712 gid 151 Allergen pre-alpha-/beta-gliadin A-II   | Triticum aestivum                       | 35.00% | 2of431  | 6.8e-006 | 28.40% | 176 | <a href="#">gi 170712</a>     | <a href="#">GO!</a> |
| 90 | gi 170724 gid 151 Allergen pre-alpha-/beta-gliadin A-IV   | Triticum aestivum                       | 35.00% | 2of431  | 2.7e-006 | 29.00% | 176 | <a href="#">gi 170724</a>     | <a href="#">GO!</a> |

| <b>Q7XB53: Cruciferin (Fragment) [Brassica napus (Rape)]</b> |                                                                                                                                                                                                                                                                                                                                                                                                                                                                                                                          |
|--------------------------------------------------------------|--------------------------------------------------------------------------------------------------------------------------------------------------------------------------------------------------------------------------------------------------------------------------------------------------------------------------------------------------------------------------------------------------------------------------------------------------------------------------------------------------------------------------|
| <b>Database</b>                                              | AllergenOnline Database v19 (February 10, 2019)                                                                                                                                                                                                                                                                                                                                                                                                                                                                          |
| <b>Input Query</b>                                           | >query<br>QQFPNECQLDQLNALEP SHVLKAEAGRIEVDHHPQLRCSGVSFVRYIIESKGLYLPSF<br>FSTAKLSFVAKGEGLMGRVVP GCAETFQDSSVFQPGGGS PFGEQGQQGQQGQGHQGG<br>QGQQGQQGQQGQQSQQGQFRDMHQKVEHIRTGDTIATHPGVAQWFYNDGNQPLVIVSVLD<br>LASHQNQLDRNPRPFYLAGNNPQQGVWIEGREQQPQKNILNGFTPEVLAKAFKIDVRTAQ<br>QLQNQQDNRGNI IRVQGPFSVIRPPLRSQRPQEEVNGLEETICSARCTDNLDDPSNADVY<br>KPQLGYISTLNSYDLPILRFLRLSALRGSIRQNAMVLPQWNANANAVLYVTDGEAHVQVV<br>NDNGDRVFDGQVSQQGQLLSIPQGFVSVKRATSEQFRWIEFKTNANAQINTLAGRTSVLRG<br>LPLEVISNGYQISLEEARRVKFNTIETTLTHSSGPASYGGPRKADA |
| <b>Length</b>                                                | 466                                                                                                                                                                                                                                                                                                                                                                                                                                                                                                                      |
| <b>Number of 80 mers</b>                                     | 387                                                                                                                                                                                                                                                                                                                                                                                                                                                                                                                      |
| <b>Number of Sequences with hits</b>                         | 57                                                                                                                                                                                                                                                                                                                                                                                                                                                                                                                       |

| Hit # | Defline                                                   | Species                | Best %ID | # Hits > 35% | Full Alignment |        |        | Links                         |                     |
|-------|-----------------------------------------------------------|------------------------|----------|--------------|----------------|--------|--------|-------------------------------|---------------------|
|       |                                                           |                        |          |              | E-val          | %ID    | length | NCBI                          | Details             |
| 1     | gi 62240390 gid 837 Allergen 11S globulin precursor [Sina | Sinapis alba           | 76.50%   | 387of387     | 3.5e-029       | 61.00% | 472    | <a href="#">gi 62240390</a>   | <a href="#">GO!</a> |
| 2     | gi 62240392 gid 837 Allergen 11S globulin precursor [Sina | Sinapis alba           | 74.10%   | 387of387     | 1.7e-017       | 59.20% | 483    | <a href="#">gi 62240392</a>   | <a href="#">GO!</a> |
| 3     | gi 557792009 gid 392 Allergen Cor a 9 allergen [Corylus a | Corylus avellana       | 63.70%   | 353of387     | 9.4e-022       | 44.00% | 509    | <a href="#">gi 557792009</a>  | <a href="#">GO!</a> |
| 4     | gi 18479082 gid 392 Allergen 11S globulin-like protein [C | Corylus avellana       | 63.70%   | 373of387     | 1.7e-021       | 45.20% | 500    | <a href="#">gi 18479082</a>   | <a href="#">GO!</a> |
| 5     | gi 523916668 gid 1572 Putative putative Pru du 6 allergen | Prunus dulcis          | 62.51%   | 160of387     | 3.2e-010       | 48.20% | 193    | <a href="#">gi 523916668</a>  | <a href="#">GO!</a> |
| 6     | gi 307159114 gid 1572 Putative prunin 2 precursor, partia | Prunus dulcis          | 62.51%   | 387of387     | 4.3e-020       | 45.90% | 488    | <a href="#">gi 307159114</a>  | <a href="#">GO!</a> |
| 7     | gi 25991543 gid 76 Allergen allergen Ana 0 2 [Anacardium  | Anacardium occidentale | 61.30%   | 333of387     | 1.2e-022       | 44.70% | 474    | <a href="#">gi 25991543</a>   | <a href="#">GO!</a> |
| 8     | gi 1126299828 gid 2597 Putative legumin [Juglans nigra]   | Juglans nigra          | 58.79%   | 298of387     | 3.8e-021       | 42.70% | 503    | <a href="#">gi 1126299828</a> | <a href="#">GO!</a> |

|    |                                                           |                      |        |          |          |        |     |                              |                     |
|----|-----------------------------------------------------------|----------------------|--------|----------|----------|--------|-----|------------------------------|---------------------|
| 9  | gi 158998782 gid 2066 Putative 11S legumin protein [Carya | Carya illinoensis    | 58.79% | 326of387 | 3.1e-021 | 43.50% | 506 | <a href="#">gi 158998782</a> | <a href="#">GO!</a> |
| 10 | gi 307159112 gid 1572 Putative prunin 1 precursor [Prunus | Prunus dulcis        | 58.79% | 373of387 | 2.5e-020 | 44.30% | 515 | <a href="#">gi 307159112</a> | <a href="#">GO!</a> |
| 11 | gi 158998780 gid 2066 Putative 11S legumin protein [Carya | Carya illinoensis    | 58.79% | 326of387 | 3.4e-021 | 43.50% | 506 | <a href="#">gi 158998780</a> | <a href="#">GO!</a> |
| 12 | gi 258588247 gid 1572 Putative Chain A, Crystal Structure | Prunus dulcis        | 58.79% | 365of387 | 2.2e-020 | 44.10% | 515 | <a href="#">gi 258588247</a> | <a href="#">GO!</a> |
| 13 | gi 56788031 gid 817 Putative seed storage protein [Juglan | Juglans regia        | 57.52% | 325of387 | 4.4e-021 | 42.90% | 513 | <a href="#">gi 56788031</a>  | <a href="#">GO!</a> |
| 14 | gi 110349085 gid 1093 Putative Pis v 2.0201 allergen 11S  | Pistacia vera        | 56.30% | 347of387 | 1.7e-033 | 41.60% | 459 | <a href="#">gi 110349085</a> | <a href="#">GO!</a> |
| 15 | gi 156001070 gid 1093 Putative 11S globulin [Pistacia ver | Pistacia vera        | 56.30% | 338of387 | 3.2e-033 | 41.40% | 459 | <a href="#">gi 156001070</a> | <a href="#">GO!</a> |
| 16 | gi 82469930 gid 2650 Allergen 11S globulin-like protein [ | Actinidia chinensis  | 56.30% | 314of387 | 3.5e-036 | 42.90% | 466 | <a href="#">gi 82469930</a>  | <a href="#">GO!</a> |
| 17 | gi 113200131 gid 531 Putative allergenic protein [Fagopyr | Fagopyrum tataricum  | 55.00% | 297of387 | 5.5e-029 | 40.70% | 474 | <a href="#">gi 113200131</a> | <a href="#">GO!</a> |
| 18 | gi 110349083 gid 1093 Putative Pis v 2.0101 allergen11S g | Pistacia vera        | 55.00% | 313of387 | 1.6e-025 | 40.90% | 470 | <a href="#">gi 110349083</a> | <a href="#">GO!</a> |
| 19 | gi 29839255 gid 531 Putative 13S globulin seed storage pr | Fagopyrum esculentum | 55.00% | 249of387 | 9.3e-027 | 39.50% | 466 | <a href="#">gi 29839255</a>  | <a href="#">GO!</a> |
| 20 | gi 30313867 gid 347 Putative 11S globulin [Bertholletia e | Bertholletia excelsa | 53.80% | 349of387 | 1.2e-024 | 43.30% | 466 | <a href="#">gi 30313867</a>  | <a href="#">GO!</a> |
| 21 | gi 18639 gid 733 Putative glycinin subunit G3 [Glycine ma | Glycine max          | 53.80% | 274of387 | 4.8e-022 | 38.00% | 479 | <a href="#">gi 18639</a>     | <a href="#">GO!</a> |
| 22 | gi 29839419 gid 531 Putative 13S globulin seed storage pr | Fagopyrum esculentum | 53.80% | 231of387 | 9.8e-017 | 39.30% | 476 | <a href="#">gi 29839419</a>  | <a href="#">GO!</a> |
| 23 | gi 29839254 gid 531 Putative 13S globulin seed storage pr | Fagopyrum esculentum | 53.80% | 217of387 | 6.6e-017 | 37.50% | 506 | <a href="#">gi 29839254</a>  | <a href="#">GO!</a> |
| 24 | gi 18615 gid 572 Putative Glycinin-like [Glycine max]     | Glycine max          | 52.54% | 259of387 | 1.4e-016 | 37.80% | 490 | <a href="#">gi 18615</a>     | <a href="#">GO!</a> |
| 25 | gi 169973 gid 572 Putative glycinin A-1a-B-x subunit [Gly | Glycine max          | 52.54% | 259of387 | 1.3e-016 | 37.80% | 490 | <a href="#">gi 169973</a>    | <a href="#">GO!</a> |

|    |                                                           |                   |        |          |          |        |     |                              |                     |
|----|-----------------------------------------------------------|-------------------|--------|----------|----------|--------|-----|------------------------------|---------------------|
| 26 | gi 806556 gid 573 Putative A5A4B3 subunit [Glycine soja]  | Glycine soja      | 52.50% | 230of387 | 3.5e-014 | 32.00% | 569 | <a href="#">gi 806556</a>    | <a href="#">GO!</a> |
| 27 | gi 10566449 gid 574 Putative glycinin A3B4 subunit [Glyci | Glycine max       | 52.50% | 231of387 | 4.8e-013 | 34.40% | 514 | <a href="#">gi 10566449</a>  | <a href="#">GO!</a> |
| 28 | gi 4249568 gid 573 Putative glycinin [Glycine max]        | Glycine max       | 52.50% | 230of387 | 4.6e-014 | 32.30% | 569 | <a href="#">gi 4249568</a>   | <a href="#">GO!</a> |
| 29 | gi 71084277 gid 160 Allergen HMW glutenin x-type subunit  | Triticum aestivum | 52.50% | 65of387  | 0.97     | 32.80% | 198 | <a href="#">gi 71084277</a>  | <a href="#">GO!</a> |
| 30 | gi 732706 gid 573 Putative Glycinin-like protein product  | Glycine max       | 52.50% | 213of387 | 1.1e-014 | 31.90% | 568 | <a href="#">gi 732706</a>    | <a href="#">GO!</a> |
| 31 | gi 18641 gid 573 Putative glycinin [Glycine max]          | Glycine max       | 52.50% | 230of387 | 4.6e-014 | 32.20% | 569 | <a href="#">gi 18641</a>     | <a href="#">GO!</a> |
| 32 | gi 169971 gid 574 Putative glycinin precursor             | Glycine max       | 52.50% | 120of387 | 4e-013   | 39.90% | 188 | <a href="#">gi 169971</a>    | <a href="#">GO!</a> |
| 33 | gi 13183173 gid 2274 Putative 11S globulin [Sesamum indic | Sesamum indicum   | 52.46% | 318of387 | 1.6e-024 | 40.80% | 476 | <a href="#">gi 13183173</a>  | <a href="#">GO!</a> |
| 34 | gi 218265 gid 732 Putative glycinin A2B1a subunit [Glycin | Glycine max       | 51.29% | 215of387 | 3.4e-022 | 35.90% | 485 | <a href="#">gi 218265</a>    | <a href="#">GO!</a> |
| 35 | gi 18609 gid 732 Putative Glycinin A2B1a subunit-like [Gl | Glycine max       | 51.29% | 215of387 | 3.4e-022 | 35.90% | 485 | <a href="#">gi 18609</a>     | <a href="#">GO!</a> |
| 36 | gi 288860106 gid 160 Allergen high molecular weight glute | Triticum aestivum | 50.00% | 74of387  | 0.0066   | 32.40% | 225 | <a href="#">gi 288860106</a> | <a href="#">GO!</a> |
| 37 | gi 3703107 gid 291 Allergen glycinin [Arachis hypogaea]   | Arachis hypogaea  | 49.40% | 185of387 | 4.5e-014 | 33.30% | 532 | <a href="#">gi 3703107</a>   | <a href="#">GO!</a> |
| 38 | gi 22135348 gid 291 Allergen trypsin inhibitor [Arachis h | Arachis hypogaea  | 49.40% | 59of387  | 1.9e-005 | 35.80% | 204 | <a href="#">gi 22135348</a>  | <a href="#">GO!</a> |
| 39 | gi 21314465 gid 291 Allergen allergen Arah3/Arah4 [Arachi | Arachis hypogaea  | 49.40% | 223of387 | 2.2e-014 | 34.80% | 520 | <a href="#">gi 21314465</a>  | <a href="#">GO!</a> |
| 40 | gi 736319 gid 160 Allergen glutenin [Triticum aestivum]   | Triticum aestivum | 48.80% | 73of387  | 0.0014   | 30.10% | 229 | <a href="#">gi 736319</a>    | <a href="#">GO!</a> |
| 41 | gi 169969 gid 574 Putative glycinin                       | Glycine max       | 48.78% | 214of387 | 1.7e-006 | 33.10% | 514 | <a href="#">gi 169969</a>    | <a href="#">GO!</a> |
| 42 | gi 312233065 gid 291 Allergen Ara h 3 allergen [Arachis h | Arachis hypogaea  | 48.70% | 207of387 | 1.5e-015 | 36.10% | 487 | <a href="#">gi 312233065</a> | <a href="#">GO!</a> |
| 43 | gi 112380623 gid 291 Allergen iso-Ara h3 [Arachis hypogae | Arachis hypogaea  | 48.70% | 213of387 | 8.2e-016 | 36.30% | 487 | <a href="#">gi 112380623</a> | <a href="#">GO!</a> |
| 44 | gi 5712199 gid 291 Allergen glycinin [Arachis hypogaea]   | Arachis hypogaea  | 46.30% | 156of387 | 3.2e-013 | 32.40% | 512 | <a href="#">gi 5712199</a>   | <a href="#">GO!</a> |



|                                      |                                                                                                                                                                                                                                    |
|--------------------------------------|------------------------------------------------------------------------------------------------------------------------------------------------------------------------------------------------------------------------------------|
|                                      | YESEQWRHPRGPPQSPQDNGLLEETICSMRTHENIDDPARADVYPKPNLGRVTSVNSYTLPI<br>LQYIRLSATRGI LQGNAMVLPKYNMNANEILYCTQGQARIQVVDNNGQNVLDQQVQKGGQL<br>VVI PQGFAYVVQSHQNNFEWISFKTNANAMVSTLAGRTSALRALPLEVITNAFQISLEEA<br>RRIKFNTLETTLTRARGGQPQLIEEIVEA |
| <b>Length</b>                        | 509                                                                                                                                                                                                                                |
| <b>Number of 80 mers</b>             | 430                                                                                                                                                                                                                                |
| <b>Number of Sequences with hits</b> | 86                                                                                                                                                                                                                                 |

| Hit # | Defline                                                   | Species                | Best %ID | # Hits > 35% | Full Alignment |        |        | Links                         |                     |
|-------|-----------------------------------------------------------|------------------------|----------|--------------|----------------|--------|--------|-------------------------------|---------------------|
|       |                                                           |                        |          |              | E-val          | %ID    | length | NCBI                          | Details             |
| 1     | gi 62240390 gid 837 Allergen 11S globulin precursor [Sina | Sinapis alba           | 98.80%   | 430of430     | 2.4e-210       | 91.60% | 510    | <a href="#">gi 62240390</a>   | <a href="#">GO!</a> |
| 2     | gi 62240392 gid 837 Allergen 11S globulin precursor [Sina | Sinapis alba           | 97.50%   | 430of430     | 2.7e-157       | 90.10% | 523    | <a href="#">gi 62240392</a>   | <a href="#">GO!</a> |
| 3     | gi 158998782 gid 2066 Putative 11S legumin protein [Carya | Carya illinoensis      | 65.00%   | 358of430     | 1.9e-061       | 44.70% | 535    | <a href="#">gi 158998782</a>  | <a href="#">GO!</a> |
| 4     | gi 158998780 gid 2066 Putative 11S legumin protein [Carya | Carya illinoensis      | 65.00%   | 355of430     | 7.2e-062       | 44.50% | 535    | <a href="#">gi 158998780</a>  | <a href="#">GO!</a> |
| 5     | gi 1126299828 gid 2597 Putative legumin [Juglans nigra]   | Juglans nigra          | 63.79%   | 373of430     | 4.1e-061       | 43.30% | 533    | <a href="#">gi 1126299828</a> | <a href="#">GO!</a> |
| 6     | gi 56788031 gid 817 Putative seed storage protein [Juglan | Juglans regia          | 63.79%   | 368of430     | 1e-063         | 44.50% | 533    | <a href="#">gi 56788031</a>   | <a href="#">GO!</a> |
| 7     | gi 523916668 gid 1572 Putative putative Pru du 6 allergen | Prunus dulcis          | 60.04%   | 168of430     | 4.6e-020       | 49.70% | 195    | <a href="#">gi 523916668</a>  | <a href="#">GO!</a> |
| 8     | gi 25991543 gid 76 Allergen allergen Ana 0 2 [Anacardium  | Anacardium occidentale | 60.04%   | 379of430     | 7.9e-073       | 46.20% | 487    | <a href="#">gi 25991543</a>   | <a href="#">GO!</a> |
| 9     | gi 307159114 gid 1572 Putative prunin 2 precursor, partia | Prunus dulcis          | 60.04%   | 425of430     | 5.6e-040       | 47.00% | 513    | <a href="#">gi 307159114</a>  | <a href="#">GO!</a> |
| 10    | gi 18479082 gid 392 Allergen 11S globulin-like protein [C | Corylus avellana       | 58.79%   | 394of430     | 7.4e-062       | 45.60% | 528    | <a href="#">gi 18479082</a>   | <a href="#">GO!</a> |
| 11    | gi 557792009 gid 392 Allergen Cor a 9 allergen [Corylus a | Corylus avellana       | 58.79%   | 391of430     | 4.6e-062       | 45.50% | 528    | <a href="#">gi 557792009</a>  | <a href="#">GO!</a> |



|    |                                                           |                      |        |          |          |        |     |                              |     |
|----|-----------------------------------------------------------|----------------------|--------|----------|----------|--------|-----|------------------------------|-----|
| 12 | gi 258588247 gid 1572 Putative Chain A, Crystal Structure | Prunus dulcis        | 58.40% | 423of430 | 1e-050   | 46.30% | 521 | <a href="#">gi 258588247</a> | GO! |
| 13 | gi 307159112 gid 1572 Putative prunin 1 precursor [Prunus | Prunus dulcis        | 58.40% | 430of430 | 4e-051   | 46.10% | 536 | <a href="#">gi 307159112</a> | GO! |
| 14 | gi 82469930 gid 2650 Allergen 11S globulin-like protein [ | Actinidia chinensis  | 56.30% | 327of430 | 3.5e-069 | 41.40% | 500 | <a href="#">gi 82469930</a>  | GO! |
| 15 | gi 736319 gid 160 Allergen glutenin [Triticum aestivum]   | Triticum aestivum    | 56.26% | 70of430  | 2.5e-011 | 33.30% | 207 | <a href="#">gi 736319</a>    | GO! |
| 16 | gi 288860106 gid 160 Allergen high molecular weight glute | Triticum aestivum    | 55.60% | 79of430  | 8e-015   | 34.80% | 224 | <a href="#">gi 288860106</a> | GO! |
| 17 | gi 110349083 gid 1093 Putative Pis v 2.0101 allergen11S g | Pistacia vera        | 55.00% | 345of430 | 6.7e-051 | 41.10% | 518 | <a href="#">gi 110349083</a> | GO! |
| 18 | gi 156001070 gid 1093 Putative 11S globulin [Pistacia ver | Pistacia vera        | 55.00% | 361of430 | 4.8e-055 | 41.90% | 513 | <a href="#">gi 156001070</a> | GO! |
| 19 | gi 110349085 gid 1093 Putative Pis v 2.0201 allergen 11S  | Pistacia vera        | 55.00% | 359of430 | 9.1e-055 | 41.70% | 513 | <a href="#">gi 110349085</a> | GO! |
| 20 | gi 71084277 gid 160 Allergen HMW glutenin x-type subunit  | Triticum aestivum    | 55.00% | 75of430  | 1.2e-010 | 34.10% | 252 | <a href="#">gi 71084277</a>  | GO! |
| 21 | gi 13183173 gid 2274 Putative 11S globulin [Sesamum indic | Sesamum indicum      | 53.80% | 343of430 | 4.8e-063 | 42.10% | 478 | <a href="#">gi 13183173</a>  | GO! |
| 22 | gi 113200131 gid 531 Putative allergenic protein [Fagopyr | Fagopyrum tataricum  | 53.80% | 255of430 | 4.4e-044 | 35.60% | 523 | <a href="#">gi 113200131</a> | GO! |
| 23 | gi 30313867 gid 347 Putative 11S globulin [Bertholletia e | Bertholletia excelsa | 52.50% | 309of430 | 2.3e-059 | 39.70% | 506 | <a href="#">gi 30313867</a>  | GO! |
| 24 | gi 10566449 gid 574 Putative glycinin A3B4 subunit [Glyci | Glycine max          | 51.25% | 264of430 | 1.6e-028 | 34.40% | 546 | <a href="#">gi 10566449</a>  | GO! |
| 25 | gi 29839254 gid 531 Putative 13S globulin seed storage pr | Fagopyrum esculentum | 51.25% | 240of430 | 1.1e-042 | 34.60% | 540 | <a href="#">gi 29839254</a>  | GO! |
| 26 | gi 18639 gid 733 Putative glycinin subunit G3 [Glycine ma | Glycine max          | 51.20% | 267of430 | 3e-039   | 36.00% | 516 | <a href="#">gi 18639</a>     | GO! |
| 27 | gi 806556 gid 573 Putative A5A4B3 subunit [Glycine soja]  | Glycine soja         | 50.60% | 256of430 | 3.7e-029 | 31.70% | 580 | <a href="#">gi 806556</a>    | GO! |
| 28 | gi 4249568 gid 573 Putative glycinin [Glycine max]        | Glycine max          | 50.60% | 256of430 | 2.7e-029 | 31.70% | 580 | <a href="#">gi 4249568</a>   | GO! |

|    |                                                           |                      |        |          |          |        |     |                              |     |
|----|-----------------------------------------------------------|----------------------|--------|----------|----------|--------|-----|------------------------------|-----|
| 29 | gi 18641 gid 573 Putative glycinin [Glycine max]          | Glycine max          | 50.60% | 239of430 | 2.7e-029 | 31.40% | 580 | <a href="#">gi 18641</a>     | GO! |
| 30 | gi 22090 gid 160 Allergen HMW glutenin subunit 1By9 [Trit | Triticum aestivum    | 50.02% | 69of430  | 1e-010   | 30.60% | 222 | <a href="#">gi 22090</a>     | GO! |
| 31 | gi 508732625 gid 160 Allergen high molecular weight glute | Triticum aestivum    | 50.00% | 70of430  | 6.7e-012 | 31.50% | 267 | <a href="#">gi 508732625</a> | GO! |
| 32 | gi 29839255 gid 531 Putative 13S globulin seed storage pr | Fagopyrum esculentum | 50.00% | 213of430 | 3.2e-041 | 34.20% | 512 | <a href="#">gi 29839255</a>  | GO! |
| 33 | gi 170743 gid 160 Allergen HMW glutenin subunit Ax2* [Tri | Triticum aestivum    | 50.00% | 70of430  | 6.9e-012 | 31.50% | 267 | <a href="#">gi 170743</a>    | GO! |
| 34 | gi 169973 gid 572 Putative glycinin A-1a-B-x subunit [Gly | Glycine max          | 50.00% | 267of430 | 2.3e-046 | 37.10% | 517 | <a href="#">gi 169973</a>    | GO! |
| 35 | gi 18615 gid 572 Putative Glycinin-like [Glycine max]     | Glycine max          | 50.00% | 267of430 | 1.2e-046 | 37.10% | 517 | <a href="#">gi 18615</a>     | GO! |
| 36 | gi 29839419 gid 531 Putative 13S globulin seed storage pr | Fagopyrum esculentum | 50.00% | 236of430 | 2.1e-044 | 36.80% | 486 | <a href="#">gi 29839419</a>  | GO! |
| 37 | gi 169969 gid 574 Putative glycinin                       | Glycine max          | 50.00% | 242of430 | 6.3e-015 | 33.50% | 546 | <a href="#">gi 169969</a>    | GO! |
| 38 | gi 21743 gid 160 Allergen high molecular weight glutenin  | Triticum aestivum    | 50.00% | 69of430  | 3.7e-012 | 31.80% | 267 | <a href="#">gi 21743</a>     | GO! |
| 39 | gi 732706 gid 573 Putative Glycinin-like protein product  | Glycine max          | 49.40% | 237of430 | 1.1e-028 | 31.30% | 579 | <a href="#">gi 732706</a>    | GO! |
| 40 | gi 21751 gid 160 Allergen high molecular weight glutenin  | Triticum aestivum    | 48.78% | 71of430  | 1.3e-009 | 30.50% | 266 | <a href="#">gi 21751</a>     | GO! |
| 41 | gi 218265 gid 732 Putative glycinin A2B1a subunit [Glycin | Glycine max          | 48.70% | 244of430 | 1.4e-029 | 35.40% | 503 | <a href="#">gi 218265</a>    | GO! |
| 42 | gi 18609 gid 732 Putative Glycinin A2B1a subunit-like [Gl | Glycine max          | 48.70% | 244of430 | 1.4e-029 | 35.40% | 503 | <a href="#">gi 18609</a>     | GO! |
| 43 | gi 5381325 gid 2273 Allergen 11S globulin precursor [Sesa | Sesamum indicum      | 48.10% | 238of430 | 5.9e-054 | 35.00% | 503 | <a href="#">gi 5381325</a>   | GO! |
| 44 | gi 224036293 gid 291 Allergen Chain A, Crystal Structure  | Arachis hypogaea     | 47.50% | 187of430 | 6.1e-027 | 32.70% | 511 | <a href="#">gi 224036293</a> | GO! |
| 45 | gi 199732457 gid 291 Allergen arachin Arah3 isoform [Arac | Arachis hypogaea     | 47.50% | 187of430 | 6.4e-027 | 32.70% | 511 | <a href="#">gi 199732457</a> | GO! |

|    |                                                           |                                |        |          |          |        |     |              |     |
|----|-----------------------------------------------------------|--------------------------------|--------|----------|----------|--------|-----|--------------|-----|
| 46 | gi 21314465 gid 291 Allergen allergen Arah3/Arah4 [Arachi | Arachis hypogaea               | 47.50% | 219of430 | 2.1e-025 | 33.20% | 548 | gi 21314465  | GO! |
| 47 | gi 169971 gid 574 Putative glycinin precursor             | Glycine max                    | 47.50% | 116of430 | 4.9e-028 | 39.80% | 191 | gi 169971    | GO! |
| 48 | gi 5712199 gid 291 Allergen glycinin [Arachis hypogaea]   | Arachis hypogaea               | 47.50% | 145of430 | 1.5e-023 | 31.70% | 511 | gi 5712199   | GO! |
| 49 | gi 22135348 gid 291 Allergen trypsin inhibitor [Arachis h | Arachis hypogaea               | 47.50% | 77of430  | 3.1e-014 | 34.70% | 242 | gi 22135348  | GO! |
| 50 | gi 21779 gid 160 Allergen HMW glutenin-like protein produ | Triticum aestivum              | 47.50% | 68of430  | 1.2e-006 | 26.60% | 418 | gi 21779     | GO! |
| 51 | gi 3703107 gid 291 Allergen glycinin [Arachis hypogaea]   | Arachis hypogaea               | 46.90% | 174of430 | 1.2e-025 | 32.10% | 511 | gi 3703107   | GO! |
| 52 | gi 584592120 gid 2481 Putative 13S globulin [Fagopyrum es | Fagopyrum esculentum           | 46.30% | 218of430 | 3.1e-028 | 34.10% | 496 | gi 584592120 | GO! |
| 53 | gi 584592116 gid 2481 Putative 13S globulin [Fagopyrum es | Fagopyrum esculentum           | 46.30% | 228of430 | 3.1e-028 | 34.30% | 496 | gi 584592116 | GO! |
| 54 | gi 112380623 gid 291 Allergen iso-Ara h3 [Arachis hypogae | Arachis hypogaea               | 46.22% | 186of430 | 7.2e-027 | 33.50% | 516 | gi 112380623 | GO! |
| 55 | gi 312233065 gid 291 Allergen Ara h 3 allergen [Arachis h | Arachis hypogaea               | 46.22% | 170of430 | 2.6e-026 | 33.30% | 516 | gi 312233065 | GO! |
| 56 | gi 21930 gid 154 Putative LMW glutenin [Triticum turgidum | Triticum turgidum subsp. durum | 43.80% | 35of430  | 3e-006   | 27.50% | 171 | gi 21930     | GO! |
| 57 | gi 170738 gid 152 Allergen gamma-gliadin                  | Triticum aestivum              | 43.79% | 33of430  | 0.0032   | 29.80% | 208 | gi 170738    | GO! |
| 58 | gi 170730 gid 154 Putative pre-gamma-gliadin B-I          | Triticum aestivum              | 43.71% | 38of430  | 3e-005   | 40.50% | 79  | gi 170730    | GO! |
| 59 | gi 170732 gid 154 Putative gamma-gliadin                  | Triticum aestivum              | 43.71% | 38of430  | 3.2e-005 | 40.50% | 79  | gi 170732    | GO! |
| 60 | gi 75219081 gid 154 Putative LMM glutenin 1               | Triticum aestivum              | 42.52% | 37of430  | 1.5e-005 | 26.60% | 173 | gi 75219081  | GO! |
| 61 | gi 62550933 gid 154 Putative putative LMW-glutenin subuni | Triticum aestivum              | 42.52% | 46of430  | 0.047    | 49.30% | 69  | gi 62550933  | GO! |
| 62 | gi 283476402 gid 1617 Putative alpha/beta gliadin precurs | Triticum aestivum              | 41.29% | 36of430  | 0.00054  | 25.90% | 228 | gi 283476402 | GO! |
| 63 | gi 170736 gid 152 Allergen gamma-gliadin                  | Triticum aestivum              | 41.28% | 35of430  | 0.015    | 32.30% | 155 | gi 170736    | GO! |

|    |                                                           |                                         |        |         |          |        |     |               |     |
|----|-----------------------------------------------------------|-----------------------------------------|--------|---------|----------|--------|-----|---------------|-----|
| 64 | gi 508732621 gid 152 Allergen gamma-gliadin, partial [Tri | Triticum aestivum                       | 41.28% | 35of430 | 0.00086  | 31.00% | 203 | gi 508732621  | GO! |
| 65 | gi 1137166044 gid 151 Allergen alpha-gliadin, partial [Tr | Triticum monococcum subsp. aegilopoides | 40.01% | 39of430 | 8.8e-007 | 29.70% | 195 | gi 1137166044 | GO! |
| 66 | gi 897811 gid 160 Allergen HMW gluten-like protein produc | Triticum aestivum                       | 40.01% | 38of430 | 9.7e-006 | 48.40% | 64  | gi 897811     | GO! |
| 67 | gi 208605348 gid 150 Allergen D-type LMW glutenin subunit | Triticum aestivum                       | 40.00% | 21of430 | 7.7e-005 | 27.20% | 250 | gi 208605348  | GO! |
| 68 | gi 208605346 gid 150 Allergen D-type LMW glutenin subunit | Triticum aestivum                       | 40.00% | 21of430 | 6.6e-005 | 29.20% | 209 | gi 208605346  | GO! |
| 69 | gi 21757 gid 151 Allergen Gliadin-like protein product [T | Triticum aestivum                       | 39.99% | 35of430 | 0.00019  | 29.80% | 178 | gi 21757      | GO! |
| 70 | gi 21761 gid 151 Allergen Gliadin-like protein product [T | Triticum aestivum                       | 38.79% | 14of430 | 6.1e-005 | 26.80% | 179 | gi 21761      | GO! |
| 71 | gi 21926 gid 154 Putative glutenin-like protein product [ | Triticum turgidum subsp. durum          | 38.78% | 36of430 | 3.9e-005 | 24.10% | 174 | gi 21926      | GO! |
| 72 | gi 170708 gid 152 Allergen gamma-gliadin B precursor      | Triticum aestivum                       | 38.77% | 32of430 | 0.029    | 29.50% | 200 | gi 170708     | GO! |
| 73 | gi 170702 gid 152 Allergen gamma gliadin precursor        | Triticum aestivum                       | 38.76% | 27of430 | 0.058    | 28.20% | 188 | gi 170702     | GO! |
| 74 | gi 170724 gid 151 Allergen pre-alpha-/beta-gliadin A-IV   | Triticum aestivum                       | 38.76% | 18of430 | 6e-006   | 28.30% | 240 | gi 170724     | GO! |
| 75 | gi 73912496 gid 150 Allergen omega-5 gliadin [Triticum ae | Triticum aestivum                       | 38.72% | 27of430 | 1.1e-006 | 29.00% | 217 | gi 73912496   | GO! |
| 76 | gi 1063270 gid 152 Allergen gamma-gliadin precursor [Trit | Triticum aestivum                       | 38.72% | 1of430  | 0.024    | 30.10% | 193 | gi 1063270    | GO! |
| 77 | gi 208605344 gid 150 Allergen D-type LMW glutenin subunit | Triticum aestivum                       | 37.54% | 1of430  | 0.19     | 26.40% | 231 | gi 208605344  | GO! |
| 78 | gi 508732623 gid 150 Allergen omega-gliadin, partial [Tri | Triticum aestivum                       | 37.54% | 31of430 | 0.16     | 45.50% | 66  | gi 508732623  | GO! |
| 79 | gi 21673 gid 151 Allergen Alpha/beta gliadin-like protein | Triticum aestivum                       | 37.52% | 30of430 | 5e-007   | 28.80% | 243 | gi 21673      | GO! |
| 80 | gi 170740 gid 151 Allergen gliadin                        | Triticum urartu                         | 37.52% | 30of430 | 0.00049  | 29.40% | 177 | gi 170740     | GO! |

|    |                                                           |                   |        |         |          |        |     |                             |     |
|----|-----------------------------------------------------------|-------------------|--------|---------|----------|--------|-----|-----------------------------|-----|
| 81 | gi 21783 gid 154 Putative LMW glutenin-like protein produ | Triticum aestivum | 37.00% | 3of430  | 0.00039  | 26.20% | 240 | <a href="#">gi 21783</a>    | GO! |
| 82 | gi 75317968 gid 154 Putative LMM glutenin 3               | Triticum aestivum | 36.27% | 2of430  | 0.00035  | 27.90% | 208 | <a href="#">gi 75317968</a> | GO! |
| 83 | gi 170726 gid 151 Allergen pre-alpha-/beta-gliadin A-III  | Triticum aestivum | 36.24% | 10of430 | 0.021    | 27.50% | 204 | <a href="#">gi 170726</a>   | GO! |
| 84 | gi 21765 gid 151 Allergen Gliadin-like protein product [T | Triticum aestivum | 35.04% | 3of430  | 2.1e-006 | 29.10% | 234 | <a href="#">gi 21765</a>    | GO! |
| 85 | gi 170718 gid 151 Allergen alpha/beta-gliadin precursor   | Triticum aestivum | 35.04% | 3of430  | 1.5e-006 | 29.10% | 234 | <a href="#">gi 170718</a>   | GO! |
| 86 | gi 170712 gid 151 Allergen pre-alpha-/beta-gliadin A-II   | Triticum aestivum | 35.02% | 15of430 | 2.1e-005 | 29.00% | 183 | <a href="#">gi 170712</a>   | GO! |

| Q2TLV9: 11S globulin [Sinapis alba (White mustard)] |                                                                                                                                                                                                                                                                                                                                                                                                                                                                                                                                                                                     |
|-----------------------------------------------------|-------------------------------------------------------------------------------------------------------------------------------------------------------------------------------------------------------------------------------------------------------------------------------------------------------------------------------------------------------------------------------------------------------------------------------------------------------------------------------------------------------------------------------------------------------------------------------------|
| <b>Database</b>                                     | AllergenOnline Database v19 (February 10, 2019)                                                                                                                                                                                                                                                                                                                                                                                                                                                                                                                                     |
| <b>Input Query</b>                                  | >query<br>MVKLAHLLVATVGVLLVLNGCLARQSLGVPPQVKDACNLNDLVDLQPTETIKSEAGRLEY<br>WDHNNPQIRCAGVSIARLVIEQGGFYLPFFSSPKISYVVQGMGISGRVIPGCAETFMDS<br>QPMQGGQQGHQGGQQGGQQGGQQGGQQGGQQGGQQGGQQGGQQGGQQGGQQGGQQGG<br>GQQGFRDMYQKVEHVRHGDVIANTPGSAHWIYNTGDKPLVIISLLDIANYQNQLDRNPRV<br>FRLAGNNPQGGFGGPQQQPQQNILNGFDPQVIAQALKIDVRLAQELQNKQDSRGNIVRV<br>KGPVFQVVRPPLRQAYESEQWRHPRGPPQSPQDNGLLEETICSMRTHENIDDPARADIYKPN<br>LGRVTSVNSYTIPILOQYIRLSATRGILQGSAMVLPKYNMNEANEILYCTQGQARIQVNDN<br>GQNVLDQQVQKQLVVI PQGFAYVVQSQNNFEWISFKTNANAMISTLAGRTSALRALPLE<br>VITNAFQISLEEARKIKFNTLETTLTRARGGQQPQLIEEIVEV |
| <b>Length</b>                                       | 523                                                                                                                                                                                                                                                                                                                                                                                                                                                                                                                                                                                 |
| <b>Number of 80 mers</b>                            | 444                                                                                                                                                                                                                                                                                                                                                                                                                                                                                                                                                                                 |
| <b>Number of Sequences with hits</b>                | 96                                                                                                                                                                                                                                                                                                                                                                                                                                                                                                                                                                                  |

| Hit # | Define | Species | Best %ID | # Hits > 35% | Full Alignment |     |        | Links |         |
|-------|--------|---------|----------|--------------|----------------|-----|--------|-------|---------|
|       |        |         |          |              | E-val          | %ID | length | NCBI  | Details |

|    |                                                                        |                        |         |          |          |         |     |                               |     |
|----|------------------------------------------------------------------------|------------------------|---------|----------|----------|---------|-----|-------------------------------|-----|
| 1  | gi 62240390 gid 837 Allergen 11S globulin precursor [Sinapis alba]     | Sinapis alba           | 100.00% | 444of444 | 6.6e-160 | 92.20%  | 523 | <a href="#">gi 62240390</a>   | GO! |
| 2  | gi 62240392 gid 837 Allergen 11S globulin precursor [Sinapis alba]     | Sinapis alba           | 100.00% | 444of444 | 0        | 100.00% | 523 | <a href="#">gi 62240392</a>   | GO! |
| 3  | gi 288860106 gid 160 Allergen high molecular weight glutenin           | Triticum aestivum      | 68.80%  | 99of444  | 1.3e-012 | 38.60%  | 228 | <a href="#">gi 288860106</a>  | GO! |
| 4  | gi 736319 gid 160 Allergen glutenin [Triticum aestivum]                | Triticum aestivum      | 66.21%  | 97of444  | 4.7e-014 | 35.10%  | 282 | <a href="#">gi 736319</a>     | GO! |
| 5  | gi 158998782 gid 2066 Putative 11S legumin protein [Carya illinoensis] | Carya illinoensis      | 63.79%  | 360of444 | 6.3e-041 | 41.90%  | 532 | <a href="#">gi 158998782</a>  | GO! |
| 6  | gi 56788031 gid 817 Putative seed storage protein [Juglans regia]      | Juglans regia          | 62.51%  | 367of444 | 1.1e-041 | 41.70%  | 545 | <a href="#">gi 56788031</a>   | GO! |
| 7  | gi 1126299828 gid 2597 Putative legumin [Juglans nigra]                | Juglans nigra          | 62.51%  | 364of444 | 2.5e-041 | 40.80%  | 539 | <a href="#">gi 1126299828</a> | GO! |
| 8  | gi 158998780 gid 2066 Putative 11S legumin protein [Carya illinoensis] | Carya illinoensis      | 62.51%  | 357of444 | 5.4e-041 | 41.50%  | 532 | <a href="#">gi 158998780</a>  | GO! |
| 9  | gi 25991543 gid 76 Allergen allergen Ana 0 2 [Anacardium occidentale]  | Anacardium occidentale | 61.30%  | 380of444 | 9.9e-070 | 42.70%  | 510 | <a href="#">gi 25991543</a>   | GO! |
| 10 | gi 18479082 gid 392 Allergen 11S globulin-like protein C               | Corylus avellana       | 59.30%  | 399of444 | 4e-041   | 44.20%  | 545 | <a href="#">gi 18479082</a>   | GO! |
| 11 | gi 258588247 gid 1572 Putative Chain A, Crystal Structure              | Prunus dulcis          | 59.30%  | 417of444 | 6.5e-053 | 45.20%  | 524 | <a href="#">gi 258588247</a>  | GO! |
| 12 | gi 557792009 gid 392 Allergen Cor a 9 allergen [Corylus avellana]      | Corylus avellana       | 59.30%  | 390of444 | 3.4e-041 | 43.70%  | 545 | <a href="#">gi 557792009</a>  | GO! |
| 13 | gi 307159112 gid 1572 Putative prunin 1 precursor [Prunus dulcis]      | Prunus dulcis          | 59.30%  | 436of444 | 2.6e-053 | 44.90%  | 543 | <a href="#">gi 307159112</a>  | GO! |
| 14 | gi 307159114 gid 1572 Putative prunin 2 precursor, partial             | Prunus dulcis          | 58.00%  | 423of444 | 3.4e-062 | 44.00%  | 534 | <a href="#">gi 307159114</a>  | GO! |
| 15 | gi 21751 gid 160 Allergen high molecular weight glutenin               | Triticum aestivum      | 57.52%  | 76of444  | 4.2e-009 | 31.30%  | 307 | <a href="#">gi 21751</a>      | GO! |
| 16 | gi 71084277 gid 160 Allergen HMW glutenin x-type subunit               | Triticum aestivum      | 57.52%  | 85of444  | 6.8e-010 | 34.80%  | 253 | <a href="#">gi 71084277</a>   | GO! |
| 17 | gi 523916668 gid 1572 Putative putative Prunin 6 allergen              | Prunus dulcis          | 57.50%  | 168of444 | 4.8e-020 | 46.20%  | 208 | <a href="#">gi 523916668</a>  | GO! |

|    |                                                           |                     |        |          |          |        |     |                              |     |
|----|-----------------------------------------------------------|---------------------|--------|----------|----------|--------|-----|------------------------------|-----|
| 18 | gi 22090 gid 160 Allergen HMW glutenin subunit 1By9 [Trit | Triticum aestivum   | 57.48% | 84of444  | 4e-011   | 32.10% | 287 | <a href="#">gi 22090</a>     | GO! |
| 19 | gi 21743 gid 160 Allergen high molecular weight glutenin  | Triticum aestivum   | 56.80% | 89of444  | 2.2e-011 | 35.20% | 267 | <a href="#">gi 21743</a>     | GO! |
| 20 | gi 21779 gid 160 Allergen HMW glutenin-like protein produ | Triticum aestivum   | 56.60% | 81of444  | 9.5e-009 | 28.60% | 416 | <a href="#">gi 21779</a>     | GO! |
| 21 | gi 82469930 gid 2650 Allergen 11S globulin-like protein [ | Actinidia chinensis | 56.30% | 344of444 | 4.1e-067 | 39.70% | 514 | <a href="#">gi 82469930</a>  | GO! |
| 22 | gi 110349085 gid 1093 Putative Pis v 2.0201 allergen 11S  | Pistacia vera       | 56.30% | 332of444 | 9.2e-053 | 39.50% | 516 | <a href="#">gi 110349085</a> | GO! |
| 23 | gi 156001070 gid 1093 Putative 11S globulin [Pistacia ver | Pistacia vera       | 56.30% | 332of444 | 4.9e-053 | 39.70% | 516 | <a href="#">gi 156001070</a> | GO! |
| 24 | gi 110349083 gid 1093 Putative Pis v 2.0101 allergen11S g | Pistacia vera       | 56.30% | 335of444 | 1.6e-047 | 39.50% | 522 | <a href="#">gi 110349083</a> | GO! |
| 25 | gi 508732625 gid 160 Allergen high molecular weight glute | Triticum aestivum   | 56.24% | 87of444  | 2.1e-011 | 34.20% | 275 | <a href="#">gi 508732625</a> | GO! |
| 26 | gi 170743 gid 160 Allergen HMW glutenin subunit Ax2* [Tri | Triticum aestivum   | 56.24% | 87of444  | 2.1e-011 | 34.20% | 275 | <a href="#">gi 170743</a>    | GO! |
| 27 | gi 13183173 gid 2274 Putative 11S globulin [Sesamum indic | Sesamum indicum     | 53.80% | 345of444 | 2e-060   | 41.10% | 482 | <a href="#">gi 13183173</a>  | GO! |
| 28 | gi 10566449 gid 574 Putative glycinin A3B4 subunit [Glyci | Glycine max         | 53.80% | 241of444 | 6.4e-027 | 32.40% | 558 | <a href="#">gi 10566449</a>  | GO! |
| 29 | gi 113200131 gid 531 Putative allergenic protein [Fagopyr | Fagopyrum tataricum | 53.80% | 226of444 | 2e-042   | 35.20% | 497 | <a href="#">gi 113200131</a> | GO! |
| 30 | gi 806556 gid 573 Putative A5A4B3 subunit [Glycine soja]  | Glycine soja        | 52.50% | 236of444 | 8.3e-027 | 30.20% | 592 | <a href="#">gi 806556</a>    | GO! |
| 31 | gi 169973 gid 572 Putative glycinin A-1a-B-x subunit [Gly | Glycine max         | 52.50% | 249of444 | 1.3e-031 | 35.70% | 529 | <a href="#">gi 169973</a>    | GO! |
| 32 | gi 4249568 gid 573 Putative glycinin [Glycine max]        | Glycine max         | 52.50% | 236of444 | 6.1e-027 | 30.20% | 592 | <a href="#">gi 4249568</a>   | GO! |
| 33 | gi 18615 gid 572 Putative Glycinin-like [Glycine max]     | Glycine max         | 52.50% | 250of444 | 1.5e-031 | 35.70% | 529 | <a href="#">gi 18615</a>     | GO! |
| 34 | gi 18641 gid 573 Putative glycinin [Glycine max]          | Glycine max         | 52.50% | 220of444 | 6e-027   | 29.70% | 592 | <a href="#">gi 18641</a>     | GO! |

|    |                                                           |                      |        |          |          |        |     |              |     |
|----|-----------------------------------------------------------|----------------------|--------|----------|----------|--------|-----|--------------|-----|
| 35 | gi 18639 gid 733 Putative glycinin subunit G3 [Glycine ma | Glycine max          | 51.90% | 252of444 | 3.3e-038 | 35.00% | 525 | gi 18639     | GO! |
| 36 | gi 169969 gid 574 Putative glycinin                       | Glycine max          | 51.20% | 224of444 | 1.9e-015 | 31.50% | 558 | gi 169969    | GO! |
| 37 | gi 30313867 gid 347 Putative 11S globulin [Bertholletia e | Bertholletia excelsa | 51.20% | 308of444 | 8.1e-057 | 37.90% | 522 | gi 30313867  | GO! |
| 38 | gi 732706 gid 573 Putative Glycinin-like protein product  | Glycine max          | 51.20% | 216of444 | 1.1e-026 | 29.80% | 591 | gi 732706    | GO! |
| 39 | gi 218265 gid 732 Putative glycinin A2B1a subunit [Glycin | Glycine max          | 50.00% | 206of444 | 7.2e-029 | 34.20% | 515 | gi 218265    | GO! |
| 40 | gi 18609 gid 732 Putative Glycinin A2B1a subunit-like [Gl | Glycine max          | 50.00% | 206of444 | 7.2e-029 | 34.20% | 515 | gi 18609     | GO! |
| 41 | gi 29839419 gid 531 Putative 13S globulin seed storage pr | Fagopyrum esculentum | 49.40% | 221of444 | 3.1e-062 | 35.20% | 497 | gi 29839419  | GO! |
| 42 | gi 29839255 gid 531 Putative 13S globulin seed storage pr | Fagopyrum esculentum | 49.40% | 178of444 | 4.1e-038 | 33.20% | 488 | gi 29839255  | GO! |
| 43 | gi 29839254 gid 531 Putative 13S globulin seed storage pr | Fagopyrum esculentum | 49.40% | 223of444 | 1.3e-040 | 34.40% | 506 | gi 29839254  | GO! |
| 44 | gi 3703107 gid 291 Allergen glycinin [Arachis hypogaea]   | Arachis hypogaea     | 48.78% | 152of444 | 2.8e-025 | 32.00% | 525 | gi 3703107   | GO! |
| 45 | gi 5381325 gid 2273 Allergen 11S globulin precursor [Sesa | Sesamum indicum      | 48.10% | 218of444 | 6.9e-052 | 33.30% | 514 | gi 5381325   | GO! |
| 46 | gi 21314465 gid 291 Allergen allergen Arah3/Arah4 [Arachi | Arachis hypogaea     | 47.50% | 208of444 | 1.2e-020 | 32.40% | 561 | gi 21314465  | GO! |
| 47 | gi 170738 gid 152 Allergen gamma-gliadin                  | Triticum aestivum    | 47.50% | 52of444  | 0.00068  | 30.90% | 207 | gi 170738    | GO! |
| 48 | gi 5712199 gid 291 Allergen glycinin [Arachis hypogaea]   | Arachis hypogaea     | 47.50% | 135of444 | 8.7e-023 | 30.70% | 550 | gi 5712199   | GO! |
| 49 | gi 22135348 gid 291 Allergen trypsin inhibitor [Arachis h | Arachis hypogaea     | 47.50% | 72of444  | 1.3e-014 | 33.30% | 252 | gi 22135348  | GO! |
| 50 | gi 199732457 gid 291 Allergen arachin Arah3 isoform [Arac | Arachis hypogaea     | 47.50% | 180of444 | 4.4e-026 | 31.90% | 551 | gi 199732457 | GO! |
| 51 | gi 224036293 gid 291 Allergen Chain A, Crystal Structure  | Arachis hypogaea     | 47.50% | 180of444 | 4.2e-026 | 32.20% | 525 | gi 224036293 | GO! |



|    |                                                           |                                |        |          |          |        |     |              |     |
|----|-----------------------------------------------------------|--------------------------------|--------|----------|----------|--------|-----|--------------|-----|
| 52 | gi 312233065 gid 291 Allergen Ara h 3 allergen [Arachis h | Arachis hypogaea               | 46.30% | 176of444 | 7.8e-038 | 31.90% | 529 | gi 312233065 | GO! |
| 53 | gi 73912496 gid 150 Allergen omega-5 gliadin [Triticum ae | Triticum aestivum              | 46.30% | 54of444  | 0.00052  | 28.60% | 259 | gi 73912496  | GO! |
| 54 | gi 112380623 gid 291 Allergen iso-Ara h3 [Arachis hypogae | Arachis hypogaea               | 46.30% | 180of444 | 2.2e-038 | 32.10% | 529 | gi 112380623 | GO! |
| 55 | gi 283476402 gid 1617 Putative alpha/beta gliadin precurs | Triticum aestivum              | 46.27% | 38of444  | 1.2e-006 | 44.90% | 78  | gi 283476402 | GO! |
| 56 | gi 62550933 gid 154 Putative putative LMW-glutenin subuni | Triticum aestivum              | 46.24% | 53of444  | 5.9e-006 | 57.80% | 64  | gi 62550933  | GO! |
| 57 | gi 170736 gid 152 Allergen gamma-gliadin                  | Triticum aestivum              | 45.20% | 48of444  | 0.00016  | 49.30% | 69  | gi 170736    | GO! |
| 58 | gi 508732621 gid 152 Allergen gamma-gliadin, partial [Tri | Triticum aestivum              | 45.20% | 46of444  | 6e-005   | 29.90% | 204 | gi 508732621 | GO! |
| 59 | gi 170708 gid 152 Allergen gamma-gliadin B precursor      | Triticum aestivum              | 45.20% | 44of444  | 0.0005   | 30.20% | 212 | gi 170708    | GO! |
| 60 | gi 169971 gid 574 Putative glycinin precursor             | Glycine max                    | 45.05% | 110of444 | 1.9e-026 | 37.70% | 191 | gi 169971    | GO! |
| 61 | gi 208605346 gid 150 Allergen D-type LMW glutenin subunit | Triticum aestivum              | 45.00% | 57of444  | 0.00033  | 30.30% | 211 | gi 208605346 | GO! |
| 62 | gi 208605348 gid 150 Allergen D-type LMW glutenin subunit | Triticum aestivum              | 45.00% | 53of444  | 9.3e-005 | 28.70% | 254 | gi 208605348 | GO! |
| 63 | gi 170732 gid 154 Putative gamma-gliadin                  | Triticum aestivum              | 45.00% | 53of444  | 1e-006   | 45.00% | 80  | gi 170732    | GO! |
| 64 | gi 170730 gid 154 Putative pre-gamma-gliadin B-I          | Triticum aestivum              | 45.00% | 53of444  | 9.5e-007 | 45.00% | 80  | gi 170730    | GO! |
| 65 | gi 1063270 gid 152 Allergen gamma-gliadin precursor [Trit | Triticum aestivum              | 44.99% | 41of444  | 4.4e-005 | 30.30% | 198 | gi 1063270   | GO! |
| 66 | gi 21930 gid 154 Putative LMW glutenin [Triticum turgidum | Triticum turgidum subsp. durum | 44.97% | 56of444  | 4.6e-007 | 30.60% | 173 | gi 21930     | GO! |
| 67 | gi 508732623 gid 150 Allergen omega-gliadin, partial [Tri | Triticum aestivum              | 44.95% | 40of444  | 6.2e-005 | 27.10% | 251 | gi 508732623 | GO! |
| 68 | gi 170702 gid 152 Allergen gamma gliadin precursor        | Triticum aestivum              | 44.80% | 36of444  | 0.0012   | 39.10% | 110 | gi 170702    | GO! |
| 69 | gi 584592120 gid 2481 Putative 13S globulin [Fagopyrum es | Fagopyrum esculentum           | 43.80% | 167of444 | 3.1e-026 | 31.70% | 508 | gi 584592120 | GO! |

|    |                                                           |                                         |        |          |          |        |     |               |     |
|----|-----------------------------------------------------------|-----------------------------------------|--------|----------|----------|--------|-----|---------------|-----|
| 70 | gi 584592116 gid 2481 Putative 13S globulin [Fagopyrum es | Fagopyrum esculentum                    | 43.80% | 172of444 | 3.1e-026 | 31.90% | 508 | gi 584592116  | GO! |
| 71 | gi 170710 gid 151 Allergen alpha-type gliadin precursor p | Triticum aestivum                       | 41.25% | 38of444  | 6.1e-005 | 28.70% | 244 | gi 170710     | GO! |
| 72 | gi 208605344 gid 150 Allergen D-type LMW glutenin subunit | Triticum aestivum                       | 41.24% | 28of444  | 6.7e-006 | 27.70% | 242 | gi 208605344  | GO! |
| 73 | gi 335331566 gid 154 Putative low molecular weight gluten | Triticum aestivum                       | 41.24% | 27of444  | 0.0045   | 22.30% | 301 | gi 335331566  | GO! |
| 74 | gi 75219081 gid 154 Putative LMM glutenin 1               | Triticum aestivum                       | 41.23% | 54of444  | 1e-006   | 30.10% | 173 | gi 75219081   | GO! |
| 75 | gi 1137166044 gid 151 Allergen alpha-gliadin, partial [Tr | Triticum monococcum subsp. aegilopoides | 40.04% | 30of444  | 0.00012  | 31.00% | 174 | gi 1137166044 | GO! |
| 76 | gi 21926 gid 154 Putative glutenin-like protein product [ | Triticum turgidum subsp. durum          | 40.03% | 46of444  | 6.1e-006 | 46.40% | 69  | gi 21926      | GO! |
| 77 | gi 21773 gid 154 Putative LMW glutenin-like protein produ | Triticum aestivum                       | 40.03% | 35of444  | 0.0014   | 52.50% | 61  | gi 21773      | GO! |
| 78 | gi 508732627 gid 154 Putative low molecular weight gluten | Triticum aestivum                       | 40.03% | 35of444  | 0.0012   | 52.50% | 61  | gi 508732627  | GO! |
| 79 | gi 170734 gid 154 Putative gamma gliadin B-III            | Triticum aestivum                       | 40.03% | 35of444  | 0.001    | 52.50% | 61  | gi 170734     | GO! |
| 80 | gi 21783 gid 154 Putative LMW glutenin-like protein produ | Triticum aestivum                       | 40.02% | 45of444  | 7e-005   | 55.20% | 58  | gi 21783      | GO! |
| 81 | gi 897811 gid 160 Allergen HMW gluten-like protein produc | Triticum aestivum                       | 40.00% | 58of444  | 1.1e-006 | 50.00% | 64  | gi 897811     | GO! |
| 82 | gi 21757 gid 151 Allergen Gliadin-like protein product [T | Triticum aestivum                       | 39.99% | 10of444  | 0.00051  | 30.40% | 171 | gi 21757      | GO! |
| 83 | gi 75317968 gid 154 Putative LMM glutenin 3               | Triticum aestivum                       | 39.97% | 48of444  | 1.1e-005 | 57.10% | 56  | gi 75317968   | GO! |
| 84 | gi 170718 gid 151 Allergen alpha/beta-gliadin precursor   | Triticum aestivum                       | 39.97% | 32of444  | 8.2e-005 | 43.20% | 74  | gi 170718     | GO! |
| 85 | gi 21765 gid 151 Allergen Gliadin-like protein product [T | Triticum aestivum                       | 39.97% | 32of444  | 8.2e-005 | 43.20% | 74  | gi 21765      | GO! |
| 86 | gi 21673 gid 151 Allergen Alpha/beta gliadin-like protein | Triticum aestivum                       | 38.76% | 23of444  | 0.00024  | 28.20% | 206 | gi 21673      | GO! |
| 87 | gi 170712 gid 151 Allergen pre-alpha-/beta-gliadin A-II   | Triticum aestivum                       | 38.10% | 8of444   | 0.0039   | 24.40% | 234 | gi 170712     | GO! |

|    |                                                           |                   |        |         |         |        |     |                             |     |
|----|-----------------------------------------------------------|-------------------|--------|---------|---------|--------|-----|-----------------------------|-----|
| 88 | gi 170726 gid 151 Allergen pre-alpha-/beta-gliadin A-III  | Triticum aestivum | 38.10% | 13of444 | 0.029   | 26.80% | 213 | <a href="#">gi 170726</a>   | GO! |
| 89 | gi 21761 gid 151 Allergen Gliadin-like protein product [T | Triticum aestivum | 37.54% | 38of444 | 0.00092 | 31.40% | 169 | <a href="#">gi 21761</a>    | GO! |
| 90 | gi 170722 gid 151 Allergen pre-alpha-/beta-gliadin A-I    | Triticum aestivum | 37.54% | 24of444 | 0.00082 | 29.90% | 167 | <a href="#">gi 170722</a>   | GO! |
| 91 | gi 886967 gid 154 Putative low molecular weight glutenin  | Triticum aestivum | 37.53% | 10of444 | 0.021   | 27.00% | 189 | <a href="#">gi 886967</a>   | GO! |
| 92 | gi 886965 gid 154 Putative low molecular weight glutenin  | Triticum aestivum | 37.52% | 16of444 | 0.042   | 28.10% | 178 | <a href="#">gi 886965</a>   | GO! |
| 93 | gi 21755 gid 151 Allergen Alpha/beta gliadin-like protein | Triticum aestivum | 37.50% | 10of444 | 0.00022 | 24.40% | 225 | <a href="#">gi 21755</a>    | GO! |
| 94 | gi 170720 gid 151 Allergen alpha/beta-gliadin precursor [ | Triticum aestivum | 37.50% | 10of444 | 0.00049 | 26.30% | 224 | <a href="#">gi 170720</a>   | GO! |
| 95 | gi 886963 gid 154 Putative low molecular weight glutenin  | Triticum aestivum | 36.25% | 27of444 | 0.019   | 28.70% | 150 | <a href="#">gi 886963</a>   | GO! |
| 96 | gi 62484809 gid 152 Allergen putative gamma-gliadin [Trit | Triticum aestivum | 35.02% | 1of444  | 6.3     | 40.00% | 70  | <a href="#">gi 62484809</a> | GO! |

### C3S7F1: Oleosin S2-2 [Brassica napus (Rape)]

|                                      |                                                                                                                                                                                                                      |
|--------------------------------------|----------------------------------------------------------------------------------------------------------------------------------------------------------------------------------------------------------------------|
| <b>Database</b>                      | AllergenOnline Database v19 (February 10, 2019)                                                                                                                                                                      |
| <b>Input Query</b>                   | >query<br>MATVERRVQVDPTDKRIHLQPQYEGDVGYGYGGRADYKSSGPPSSNQIVALIVGVVPGG<br>SLLALAGLTLGASVIGLMLSVPLFLLFSPVIVPAAITIGLAVTAILASGLFGLTGLSSVS<br>WVLNLYLRGTS DTVPEQLDYAKRRMADAVGYAGQKKGEMGQYVQDKAHEAHDTS LTTETTE<br>PGKTRRHT |
| <b>Length</b>                        | 188                                                                                                                                                                                                                  |
| <b>Number of 80 mers</b>             | 109                                                                                                                                                                                                                  |
| <b>Number of Sequences with hits</b> | 10                                                                                                                                                                                                                   |

|  |                |                |  |  |                       |              |
|--|----------------|----------------|--|--|-----------------------|--------------|
|  | <b>Defline</b> | <b>Species</b> |  |  | <b>Full Alignment</b> | <b>Links</b> |
|--|----------------|----------------|--|--|-----------------------|--------------|

| Hit # |                                                           |                  | Best %ID | # Hits > 35% | E-val    | %ID    | length | NCBI                         | Details             |
|-------|-----------------------------------------------------------|------------------|----------|--------------|----------|--------|--------|------------------------------|---------------------|
| 1     | gi 49617323 gid 2298 Allergen oleosin [Corylus avellana]  | Corylus avellana | 70.01%   | 109of109     | 2.2e-042 | 52.50% | 158    | <a href="#">gi 49617323</a>  | <a href="#">GO!</a> |
| 2     | gi 113200509 gid 2283 Putative oleosin 1 [Arachis hypogae | Arachis hypogaea | 64.98%   | 104of109     | 6.5e-039 | 46.20% | 171    | <a href="#">gi 113200509</a> | <a href="#">GO!</a> |
| 3     | gi 52001239 gid 2283 Putative oleosin 2, partial [Arachis | Arachis hypogaea | 64.98%   | 106of109     | 2.6e-038 | 52.30% | 149    | <a href="#">gi 52001239</a>  | <a href="#">GO!</a> |
| 4     | gi 10834827 gid 1893 Putative oleosin [Sesamum indicum]   | Sesamum indicum  | 62.50%   | 103of109     | 2.2e-031 | 45.90% | 157    | <a href="#">gi 10834827</a>  | <a href="#">GO!</a> |
| 5     | gi 71040655 gid 2284 Putative oleosin 1 [Arachis hypogaea | Arachis hypogaea | 55.00%   | 74of109      | 1e-021   | 43.80% | 128    | <a href="#">gi 71040655</a>  | <a href="#">GO!</a> |
| 6     | gi 122218540 gid 2284 Putative Oleosin 2                  | Arachis hypogaea | 53.80%   | 71of109      | 4e-021   | 39.90% | 138    | <a href="#">gi 122218540</a> | <a href="#">GO!</a> |
| 7     | gi 198250343 gid 1238 Putative main allergen 15 kDa oleos | Sesamum indicum  | 53.80%   | 78of109      | 1.1e-021 | 40.90% | 132    | <a href="#">gi 198250343</a> | <a href="#">GO!</a> |
| 8     | gi 5381321 gid 1238 Putative 15 kDa oleosin [Sesamum indi | Sesamum indicum  | 53.80%   | 78of109      | 1.6e-021 | 40.90% | 132    | <a href="#">gi 5381321</a>   | <a href="#">GO!</a> |
| 9     | gi 29170509 gid 389 Putative oleosin [Corylus avellana]   | Corylus avellana | 50.00%   | 68of109      | 1.1e-021 | 41.00% | 117    | <a href="#">gi 29170509</a>  | <a href="#">GO!</a> |
| 10    | gi 52001241 gid 2285 Allergen oleosin 3 [Arachis hypogaea | Arachis hypogaea | 45.10%   | 77of109      | 9.1e-021 | 38.20% | 144    | <a href="#">gi 52001241</a>  | <a href="#">GO!</a> |

### C3S7F8: Oleosin S3-1 [Brassica napus (Rape)]

|                                      |                                                                                                                                                                                                         |
|--------------------------------------|---------------------------------------------------------------------------------------------------------------------------------------------------------------------------------------------------------|
| <b>Database</b>                      | AllergenOnline Database v19 (February 10, 2019)                                                                                                                                                         |
| <b>Input Query</b>                   | >query<br>MADTARTHHDITSRDQYPILGRDRDQYPYGRSDYQTSQGQDYSKTRQIAKAATAVAVTAGGSL<br>LVLSSLTLVGTVIALTVATLLVIFSPILVPALITVALLITGFLSSGGFGIADITVFSWI<br>YKYATGEHPQGSCLKLSARMKLGTKAQDIKDRAYYQQHTGGEHDDRDRTRGTHHTTTTT |
| <b>Length</b>                        | 180                                                                                                                                                                                                     |
| <b>Number of 80 mers</b>             | 101                                                                                                                                                                                                     |
| <b>Number of Sequences with hits</b> | 10                                                                                                                                                                                                      |

| Hit # | Defline                                                   | Species          | Best %ID | # Hits > 35% | Full Alignment |        |        | Links                        |                     |
|-------|-----------------------------------------------------------|------------------|----------|--------------|----------------|--------|--------|------------------------------|---------------------|
|       |                                                           |                  |          |              | E-val          | %ID    | length | NCBI                         | Details             |
| 1     | gi 5381321 gid 1238 Putative 15 kDa oleosin [Sesamum indi | Sesamum indicum  | 76.20%   | 101of101     | 6e-031         | 63.20% | 125    | <a href="#">gi 5381321</a>   | <a href="#">GO!</a> |
| 2     | gi 198250343 gid 1238 Putative main allergen 15 kDa oleos | Sesamum indicum  | 76.20%   | 101of101     | 6e-031         | 63.20% | 125    | <a href="#">gi 198250343</a> | <a href="#">GO!</a> |
| 3     | gi 29170509 gid 389 Putative oleosin [Corylus avellana]   | Corylus avellana | 73.80%   | 98of101      | 1.1e-032       | 66.90% | 121    | <a href="#">gi 29170509</a>  | <a href="#">GO!</a> |
| 4     | gi 71040655 gid 2284 Putative oleosin 1 [Arachis hypogaea | Arachis hypogaea | 70.00%   | 94of101      | 1.2e-028       | 60.80% | 125    | <a href="#">gi 71040655</a>  | <a href="#">GO!</a> |

|    |                                                           |                  |        |         |          |        |     |                              |                     |
|----|-----------------------------------------------------------|------------------|--------|---------|----------|--------|-----|------------------------------|---------------------|
| 5  | gi 122218540 gid 2284 Putative Oleosin 2                  | Arachis hypogaea | 68.80% | 94of101 | 4.6e-029 | 61.60% | 125 | <a href="#">gi 122218540</a> | <a href="#">GO!</a> |
| 6  | gi 52001241 gid 2285 Allergen oleosin 3 [Arachis hypogaea | Arachis hypogaea | 65.00% | 97of101 | 5.3e-024 | 48.70% | 156 | <a href="#">gi 52001241</a>  | <a href="#">GO!</a> |
| 7  | gi 10834827 gid 1893 Putative oleosin [Sesamum indicum]   | Sesamum indicum  | 48.10% | 79of101 | 6.1e-015 | 36.30% | 171 | <a href="#">gi 10834827</a>  | <a href="#">GO!</a> |
| 8  | gi 49617323 gid 2298 Allergen oleosin [Corylus avellana]  | Corylus avellana | 45.70% | 55of101 | 1.2e-013 | 31.50% | 149 | <a href="#">gi 49617323</a>  | <a href="#">GO!</a> |
| 9  | gi 113200509 gid 2283 Putative oleosin 1 [Arachis hypogae | Arachis hypogaea | 41.29% | 54of101 | 1.3e-015 | 32.40% | 148 | <a href="#">gi 113200509</a> | <a href="#">GO!</a> |
| 10 | gi 52001239 gid 2283 Putative oleosin 2, partial [Arachis | Arachis hypogaea | 41.29% | 55of101 | 1.9e-014 | 33.30% | 129 | <a href="#">gi 52001239</a>  | <a href="#">GO!</a> |

### Q6W7E8: Enolase [Brassica campestris (Field mustard)]

|                                      |                                                                                                                                                                                                                                                                                                                                                                                                                                                                                                 |
|--------------------------------------|-------------------------------------------------------------------------------------------------------------------------------------------------------------------------------------------------------------------------------------------------------------------------------------------------------------------------------------------------------------------------------------------------------------------------------------------------------------------------------------------------|
| <b>Database</b>                      | AllergenOnline Database v19 (February 10, 2019)                                                                                                                                                                                                                                                                                                                                                                                                                                                 |
| <b>Input Query</b>                   | >query<br>MATITAVKARQIFDSRGNPTVEVDVHTSSGVKVTAAVPSGASTGIYEALRLDGGSDYLG<br>KGVSKAVGNVNSIIGPASIGKDPTQQTAINDFMVHELDGTQNEWGWCKQKLGANAILAVS<br>LAVCKAGAVVSGIPLYKHIANLAGNPKIVLPVPAFNVINGGSHAGNKLAMQEFMILPVGA<br>SSFKEAMKMGVEVYHNLKSVIKKKYGQDATNVGDEGGFAPNIQENKEGLELLKTAIEKAG<br>YTGKVVIGMDVAASEFYSSDKTYDLNFKEENNNGSQKISGDALKDLYKSFVAEYPIVSI<br>DPFDQDDWEHYAKMTAECGDNVQIVGDDLLVTNPKGVAKAIAEKSCNALLLKVNIQISVT<br>ESIEAVKMSKRAGWGMASHRSGETEDTFIADLSVGLSTGQIKTGAPCRSERLAKYNQLL<br>RIEEELGSEAVYAGANFRKPVEPY |
| <b>Length</b>                        | 444                                                                                                                                                                                                                                                                                                                                                                                                                                                                                             |
| <b>Number of 80 mers</b>             | 365                                                                                                                                                                                                                                                                                                                                                                                                                                                                                             |
| <b>Number of Sequences with hits</b> | 16                                                                                                                                                                                                                                                                                                                                                                                                                                                                                              |

| Hit # | Define                                                    | Species            | Best %ID | # Hits > 35% | Full Alignment |        |        | Links                       |                     |
|-------|-----------------------------------------------------------|--------------------|----------|--------------|----------------|--------|--------|-----------------------------|---------------------|
|       |                                                           |                    |          |              | E-val          | %ID    | length | NCBI                        | Details             |
| 1     | gi 14423687 gid 586 Putative Enolase 2 (2-phosphoglycerat | Hevea brasiliensis | 98.80%   | 365of365     | 1.1e-170       | 89.60% | 442    | <a href="#">gi 14423687</a> | <a href="#">GO!</a> |
| 2     | gi 9581744 gid 586 Putative enolase, isoform 1 [Hevea bra | Hevea brasiliensis | 98.80%   | 365of365     | 1.6e-171       | 90.00% | 442    | <a href="#">gi 9581744</a>  | <a href="#">GO!</a> |

|    |                                                            |                           |        |          |          |        |     |                              |                     |
|----|------------------------------------------------------------|---------------------------|--------|----------|----------|--------|-----|------------------------------|---------------------|
| 3  | gi 576011129 gid 1955 Allergen RecName: Full=Alpha-enolas  | Thunnus albacares         | 88.70% | 365of365 | 2.9e-129 | 69.50% | 442 | <a href="#">gi 576011129</a> | <a href="#">GO!</a> |
| 4  | gi 385145180 gid 1959 Allergen enolase [Salmo salar]       | Salmo salar               | 88.70% | 365of365 | 5.1e-130 | 69.90% | 442 | <a href="#">gi 385145180</a> | <a href="#">GO!</a> |
| 5  | gi 197632415 gid 1959 Allergen enolase 3-2 [Salmo salar]   | Salmo salar               | 85.02% | 365of365 | 7.2e-125 | 68.00% | 441 | <a href="#">gi 197632415</a> | <a href="#">GO!</a> |
| 6  | gi 46048765 gid 2710 Allergen beta-enolase [Gallus gallus] | Gallus gallus             | 83.80% | 365of365 | 3.6e-119 | 65.10% | 441 | <a href="#">gi 46048765</a>  | <a href="#">GO!</a> |
| 7  | gi 232054 gid 396 Allergen Enolase 1 (2-phosphoglycerate   | Candida albicans          | 82.50% | 365of365 | 1.5e-111 | 63.10% | 444 | <a href="#">gi 232054</a>    | <a href="#">GO!</a> |
| 8  | gi 30314940 gid 103 Putative enolase [Rhodotorula mucilag  | Rhodotorula mucilaginosa  | 80.00% | 365of365 | 9.5e-107 | 61.00% | 441 | <a href="#">gi 30314940</a>  | <a href="#">GO!</a> |
| 9  | gi 6015094 gid 491 Putative Enolase (2-phosphoglycerate d  | Davidiella tassiana       | 77.50% | 365of365 | 1.6e-108 | 60.70% | 443 | <a href="#">gi 6015094</a>   | <a href="#">GO!</a> |
| 10 | gi 83288046 gid 329 Putative Enolase (2-phosphoglycerate   | Aspergillus fumigatus     | 77.50% | 365of365 | 7.6e-108 | 61.60% | 443 | <a href="#">gi 83288046</a>  | <a href="#">GO!</a> |
| 11 | gi 467660 gid 491 Putative enolase; phosphopyruvate hydra  | Davidiella tassiana       | 77.50% | 365of365 | 1.8e-106 | 59.80% | 443 | <a href="#">gi 467660</a>    | <a href="#">GO!</a> |
| 12 | gi 13925873 gid 329 Putative enolase [Aspergillus fumigat  | Aspergillus fumigatus     | 77.50% | 365of365 | 1.2e-107 | 61.40% | 443 | <a href="#">gi 13925873</a>  | <a href="#">GO!</a> |
| 13 | gi 14423684 gid 66 Putative Enolase (2-phosphoglycerate d  | Alternaria alternata      | 76.20% | 365of365 | 2.4e-106 | 60.60% | 444 | <a href="#">gi 14423684</a>  | <a href="#">GO!</a> |
| 14 | gi 13991101 gid 249 Putative enolase [Penicillium citrinu  | Penicillium citrinum      | 76.20% | 365of365 | 6.7e-105 | 60.50% | 443 | <a href="#">gi 13991101</a>  | <a href="#">GO!</a> |
| 15 | gi 14585753 gid 1031 Putative enolase [Curvularia lunata]  | Cochliobolus lunatus      | 75.00% | 365of365 | 4.2e-098 | 56.50% | 448 | <a href="#">gi 14585753</a>  | <a href="#">GO!</a> |
| 16 | gi 344049993 gid 2295 Putative enolase, partial [Fennerop  | Fenneropenaeus merguensis | 68.80% | 114of365 | 3.7e-031 | 66.70% | 117 | <a href="#">gi 344049993</a> | <a href="#">GO!</a> |

### Q42618- BRANA Beta-glucosidase [Brassica napus (Rape)]

**Database**

AllergenOnline Database v19 (February 10, 2019)

|                                      |                                                                                                                                                                                                                                                                                                                                                                                                                                                                                                                                                                           |
|--------------------------------------|---------------------------------------------------------------------------------------------------------------------------------------------------------------------------------------------------------------------------------------------------------------------------------------------------------------------------------------------------------------------------------------------------------------------------------------------------------------------------------------------------------------------------------------------------------------------------|
| <b>Input Query</b>                   | >query<br>MKFPLLGLLLLVLVGSPTRAEEGPVCPKTETLSRASFPPEGFMFGTATASYQVEGAVNEG<br>CRGPSLWDIYTKKFPHRVKNHNADVAVDFYHRFREDIKLMKKLNTDALRLSIAWPRI FPH<br>GRMEKGNKSEGVQFYHDLIDEELLKNDLTPLVTFHWDMPADLEDEYGGFLSERVVPDFVE<br>YANFTFHEYGDKVKNWITFNEPWVFSRSAYDVGKKAPGRCSPIKDFGHLCQDGRSGFEA<br>YVVSHNLLVSHAEAVDAFRKCEKCKGDKIGIAHSPAWFEPEDVEGGQRTVDRVLDIFMGW<br>HLDPTTYGDYPQSMKDAVGARLPKFTKAQKAKLKSADFGVGINYSSFYAKASEKPDYRQ<br>PSWATDSLVEFEPKTVDGSVKIGSQPSTAKMAVYAAGLRKLVKYIKDRYGNPEIIITENG<br>YGEDLGEKTDHVALNDHNRKYYHQRHLLSLHQAICEDKVNVTSYFVWVSLMDNFEWLDG<br>YTARFGLYYIDFQNNLTRMEKESATCSLNSNRA |
| <b>Length</b>                        | 514                                                                                                                                                                                                                                                                                                                                                                                                                                                                                                                                                                       |
| <b>Number of 80 mers</b>             | 435                                                                                                                                                                                                                                                                                                                                                                                                                                                                                                                                                                       |
| <b>Number of Sequences with hits</b> | 0                                                                                                                                                                                                                                                                                                                                                                                                                                                                                                                                                                         |

No Matches of Greater than 35% Identity Found

| <b>O23733-RAJU Cysteine synthase [Brassica juncea]</b> |                                                                                                                                                                                                                                                                                                                                                              |
|--------------------------------------------------------|--------------------------------------------------------------------------------------------------------------------------------------------------------------------------------------------------------------------------------------------------------------------------------------------------------------------------------------------------------------|
| <b>Database</b>                                        | AllergenOnline Database v19 (February 10, 2019)                                                                                                                                                                                                                                                                                                              |
| <b>Input Query</b>                                     | >query<br>MASRIAKDVTELIGNTPLVYLNNVAEGCVGRVAAKLEMMEPCSSVKDRIGFSMISDAEQK<br>GLIKPGESVLIPTSGNTGVGLAFTAAAKGYKLIITMPASMSVERRIILLAFGVELVLT<br>PAKGMKGAIKAAEELAKTPNGYMLQQFENPANPKIHYETTGPFIWKGTGDKIDGFVSGI<br>GTGGTITGAGKYLKEQNPVVKLYGVEPIESAILSGGKPGPHKIQQIGAGFIPSVLEVDLI<br>DEVVQVSSDESIDMARLLALKEGLLVGISSGAAAAAAIKLAKRPNAGKLFVAVFPSFGE<br>RYLSTVLFDATRKEAESMTFQA |
| <b>Length</b>                                          | 322                                                                                                                                                                                                                                                                                                                                                          |
| <b>Number of 80 mers</b>                               | 243                                                                                                                                                                                                                                                                                                                                                          |

| <b>Number of Sequences with hits</b> |                                                           | 1                   |                 |                        |                       |            |               |                           |                     |  |
|--------------------------------------|-----------------------------------------------------------|---------------------|-----------------|------------------------|-----------------------|------------|---------------|---------------------------|---------------------|--|
| <b>Hit #</b>                         | <b>Defline</b>                                            | <b>Species</b>      | <b>Best %ID</b> | <b># Hits &gt; 35%</b> | <b>Full Alignment</b> |            |               | <b>Links</b>              |                     |  |
|                                      |                                                           |                     |                 |                        | <b>E-val</b>          | <b>%ID</b> | <b>length</b> | <b>NCBI</b>               | <b>Details</b>      |  |
| 1                                    | gi 729764 gid 519 Putative Heat shock 70 kDa protein (All | Davidiella tassiana | 35.40%          | 13of243                | 1.2                   | 30.70%     | 140           | <a href="#">gi 729764</a> | <a href="#">GO!</a> |  |

| <b>C3S7H5-BRANA Caleosin CLO1-2 [Brassica napus (Rape)]</b> |                                                                                                                                                                                                                                                                                  |
|-------------------------------------------------------------|----------------------------------------------------------------------------------------------------------------------------------------------------------------------------------------------------------------------------------------------------------------------------------|
| <b>Database</b>                                             | AllergenOnline Database v19 (February 10, 2019)                                                                                                                                                                                                                                  |
| <b>Input Query</b>                                          | >query<br>MSTATEIMGRDAMATVAPYAPVTFHRRARVDMDDRLPKPYMPRALQAPDREHPYGTPGHK<br>NYGLSVLQQHVAFDLYDNGI IYPWETYSGLRMLGFNIIVSLIAAAVINLALSyatLTGW<br>FPSPFFPIYIHNIHKS KHGSDSRTYDNEGRFMPVNLELIFSKYAKTLPDKLSLGELWEMT<br>QQQRDAWDIFGWFASKIEWGLLYLLARDEEGFLSKEAIRRCFDGSLFEYCAKIYAGINED<br>KTAYY |
| <b>Length</b>                                               | 245                                                                                                                                                                                                                                                                              |
| <b>Number of 80 mers</b>                                    | 166                                                                                                                                                                                                                                                                              |
| <b>Number of Sequences with hits</b>                        | 0                                                                                                                                                                                                                                                                                |

No Matches of Greater than 35% Identity Found

| <b>P13244- Malate synthase. glyoxysomal [Brassica napus (Rape)]</b> |                                                 |
|---------------------------------------------------------------------|-------------------------------------------------|
| <b>Database</b>                                                     | AllergenOnline Database v19 (February 10, 2019) |



|                                      |                                                                                                                                                                                                                                                                                                                                                                                                                                                                                                                                                                                                                                 |
|--------------------------------------|---------------------------------------------------------------------------------------------------------------------------------------------------------------------------------------------------------------------------------------------------------------------------------------------------------------------------------------------------------------------------------------------------------------------------------------------------------------------------------------------------------------------------------------------------------------------------------------------------------------------------------|
| <b>Input Query</b>                   | >query<br>MELETSVYRPNVAVYDSDPDGVEVRGRYDQVFAKILTRDALGFVAELQREFRGHVRYAMEC<br>RREVKRRYNSGAVPGFDPSTKFI RDGEWVCASVPPAVADRRVEITGPVERKMI INALNSG<br>AKVFMADFEDALSPSWENLMRGQVNLKDAVDGSITFNDKARNKVYKLNQVAKLFVRPRG<br>WHLPEAHILIDGEPATGCLVDFGLYFFHNYAKFRQTQGSFGPFFYLPKMEHSREAKIWN<br>SVFERAEKMAGIERGSIRATVLIETLPAVFMNEILYELRDHSVGLNCGRWDYIFSIVKT<br>FQAHPRLLPDRVLVGMGQHFMRSYSDLLIRTCHKRGVHAMGGMAAQIPIRDDPKANEMA<br>LDLVKKDKLREVRAGHDGTWAAHPGLIPICMDAFSHMGNNPNQIKSMKRDDASAITTEEDL<br>LQIPRGVRTLEGLRLNTRVGIQYLAAWLTGSGSVPLYNLMEDAATAEISRVQNWQWIRYG<br>VELDGDGLGVRVSKELFGRVVEEEMERIEKEVKGDKFKRGMYPEACKMFTKQCTAAELDD<br>FLTLAVYDHIVAHYPINASRL |
| <b>Length</b>                        | 561                                                                                                                                                                                                                                                                                                                                                                                                                                                                                                                                                                                                                             |
| <b>Number of 80 mers</b>             | 482                                                                                                                                                                                                                                                                                                                                                                                                                                                                                                                                                                                                                             |
| <b>Number of Sequences with hits</b> | 0                                                                                                                                                                                                                                                                                                                                                                                                                                                                                                                                                                                                                               |

No Matches of Greater than 35% Identity Found

|                                                                    |                                                                                                                                                                                                                                               |
|--------------------------------------------------------------------|-----------------------------------------------------------------------------------------------------------------------------------------------------------------------------------------------------------------------------------------------|
| <b>Q7XZT2-BRAJU Glutathione S-transferase 3 [Brassica juncea ]</b> |                                                                                                                                                                                                                                               |
| <b>Database</b>                                                    | AllergenOnline Database v19 (February 10, 2019)                                                                                                                                                                                               |
| <b>Input Query</b>                                                 | >query<br>MAGIKVFGSAASPSTRVLLALHEKNLDFELVNVELKDGEHKKPEPFLSRNPFVKVPAFED<br>GDLKLFESRAITQYIAHRYEGQTNLLPADSKNIAHYA IMAIGLEVEAHQFDPVASKLAW<br>EQVFKNFYGLTTDQAVVAEEEEAKLAKVLDVYEARLKEFKYLAGEFTFTLTDLHHIPVIQYL<br>LGTPTKKLFTERPRVNEWVAEITKRPASQKILQ |

|                                      |     |
|--------------------------------------|-----|
| <b>Length</b>                        | 213 |
| <b>Number of 80 mers</b>             | 134 |
| <b>Number of Sequences with hits</b> | 4   |

| Hit # | Define                                                    | Species               | Best %ID | # Hits > 35% | Full Alignment |        |        | Links                         |                     |
|-------|-----------------------------------------------------------|-----------------------|----------|--------------|----------------|--------|--------|-------------------------------|---------------------|
|       |                                                           |                       |          |              | E-val          | %ID    | length | NCBI                          | Details             |
| 1     | gi 359326557 gid 856 Allergen glutathione S transferase c | Periplaneta americana | 40.00%   | 14of134      | 1.2e-006       | 29.40% | 163    | <a href="#">gi 359326557</a>  | <a href="#">GO!</a> |
| 2     | gi 1337340498 gid 856 Allergen glutathione S transferase  | Periplaneta americana | 40.00%   | 14of134      | 1.2e-006       | 29.20% | 161    | <a href="#">gi 1337340498</a> | <a href="#">GO!</a> |
| 3     | gi 161137518 gid 1353 Putative delta class glutathione S- | Blattella germanica   | 38.80%   | 15of134      | 4.9e-006       | 29.40% | 197    | <a href="#">gi 161137518</a>  | <a href="#">GO!</a> |
| 4     | gi 60678789 gid 856 Allergen Per a 5 allergen [Periplanet | Periplaneta americana | 38.80%   | 13of134      | 1.5e-005       | 28.80% | 163    | <a href="#">gi 60678789</a>   | <a href="#">GO!</a> |
